# Supplementary material for: A computational study for the reaction mechanism of metal-free cyanomethylation of aryl alkynoates with acetonitrile
Source: Royal Society of Chemistry journal article supplement (doi:10.1039/d1ra01649k), 2021-01-01
Supplement: d1ra01649k1.pdf [file d1ra01649k1.pdf]

**A Computational Study for the Reaction Mechanism of Metal-Free Cyanomethylation and  
Cyclization of Aryl Alkynoates with Acetonitrile**

Selçuk Eşsiz

*Department of Chemistry, Faculty of Science, Atatürk University, Erzurum, 25240, Turkey*

*Department of Chemical Engineering, Faculty of Engineering, Hakkari University, Hakkari  
30000, Turkey*

## Table of contents

|                                                                                                                                                                                                                |    |
|----------------------------------------------------------------------------------------------------------------------------------------------------------------------------------------------------------------|----|
| <b>1. The Optimized Geometries of The Transition States with Selected Interatomic Distances</b> .....                                                                                                          | 3  |
| <b>Figure S1.</b> Computed structure of <b>2/5</b> at the B3LYP/6-311G(d,p) level (im. freq.= 1800i).....                                                                                                      | 3  |
| <b>Figure S2.</b> Computed structure of <b>3/5</b> at the B3LYP/6-311G(d,p) level (im. freq.= 1781i).....                                                                                                      | 3  |
| <b>Figure S3.</b> Computed structure of <b>8a/9a</b> at the B3LYP/6-311G(d,p) level (im. freq.= 422i).....                                                                                                     | 3  |
| <b>Figure S4.</b> Computed structure of <b>9a/10a</b> at the B3LYP/6-311G(d,p) level (im. freq.= 436i).....                                                                                                    | 4  |
| <b>Figure S5.</b> Computed structure of <b>10a/11a</b> at the B3LYP/6-311G(d,p) level (im. freq.= 328i).....                                                                                                   | 4  |
| <b>Figure S6.</b> Computed structure of <b>11a/12a</b> at the B3LYP/6-311G(d,p) level (im. freq.= 326i).....                                                                                                   | 4  |
| <b>Figure S7.</b> Computed structure of <b>12a/13a</b> at the B3LYP/6-311G(d,p) level (im. freq.= 924i).....                                                                                                   | 5  |
| <b>Figure S8.</b> Computed structure of <b>8a/14a</b> at the B3LYP/6-311G(d,p) level (im. freq.= 575i).....                                                                                                    | 5  |
| <b>Figure S9.</b> Computed structure of <b>9a/12a</b> at the B3LYP/6-311G(d,p) level (im. freq.= 426i).....                                                                                                    | 5  |
| <b>Figure S10.</b> Computed structure of <b>9a/17a</b> at the B3LYP/6-311G(d,p) level (im. freq.= 333i).....                                                                                                   | 6  |
| <b>Figure S11.</b> Computed structure of <b>11a/20a</b> at the B3LYP/6-311G(d,p) level (im. freq.= 423i).....                                                                                                  | 6  |
| <b>Figure S12.</b> Computed structure of <b>17a/19a</b> at the B3LYP/6-311G(d,p) level (im. freq.= 668i).....                                                                                                  | 6  |
| <b>Figure S13.</b> Computed structure of <b>8b/9b</b> at the B3LYP/6-311G(d,p) level (im. freq.= 420i).....                                                                                                    | 7  |
| <b>Figure S14.</b> Computed structure of <b>9b/10b</b> at the B3LYP/6-311G(d,p) level (im. freq.= 432i).....                                                                                                   | 7  |
| <b>Figure S15.</b> Computed structure of <b>10b/11b</b> at the B3LYP/6-311G(d,p) level (im. freq.= 315i).....                                                                                                  | 7  |
| <b>Figure S16.</b> Computed structure of <b>11b/12b</b> at the B3LYP/6-311G(d,p) level (im. freq.= 337i).....                                                                                                  | 8  |
| <b>Figure S17.</b> Computed structure of <b>12b/13b</b> at the B3LYP/6-311G(d,p) level (im. freq.= 945i).....                                                                                                  | 8  |
| <b>Figure S18.</b> Computed structure of <b>8b/14b</b> at the B3LYP/6-311G(d,p) level (im. freq.= 573i).....                                                                                                   | 8  |
| <b>Figure S19.</b> Computed structure of <b>9b/15b</b> at the B3LYP/6-311G(d,p) level (im. freq.= 402i).....                                                                                                   | 9  |
| <b>Figure S20.</b> Computed structure of <b>9b/17b</b> at the B3LYP/6-311G(d,p) level (im. freq.= 335i).....                                                                                                   | 9  |
| <b>Figure S21.</b> Computed structure of <b>11b/20b</b> at the B3LYP/6-311G(d,p) level (im. freq.= 423i).....                                                                                                  | 9  |
| <b>Figure S22.</b> Computed structure of <b>17b/19b</b> at the B3LYP/6-311G(d,p) level (im. freq.= 677i).....                                                                                                  | 10 |
| <b>2. Relative Free Energy Profile</b> .....                                                                                                                                                                   | 10 |
| <b>Figure S23.</b> Relative free energy profile (at 403.15 K) for reaction mechanism of <b>8b</b> shown in Scheme 1 and Scheme 2 at the DLPNO-CCSD(T)/cc-PVTZ//B3LYP-6-311G(d,p) level.....                    | 10 |
| <b>Figure S24.</b> Solvent corrected relative free energy profile (at 403.15 K) for reaction mechanism of <b>8a</b> shown in Scheme 1 and Scheme 2 at the DLPNO-CCSD(T)/cc-PVTZ//B3LYP-6-311G(d,p) level. .... | 11 |
| <b>3. Single Point Energy Computations</b> .....                                                                                                                                                               | 11 |
| <b>Table 1.</b> Single point energies ( <b>E</b> ) for <b>a</b> using DLPNO-CCSD(T)/cc-PVTZ level in a.u. ....                                                                                                 | 11 |
| <b>Table 2.</b> Single point energies ( <b>E</b> ) for <b>b</b> using DLPNO-CCSD(T)/cc-PVTZ level in a.u. ....                                                                                                 | 12 |
| <b>4. Cartesian coordinates for optimized structures</b> .....                                                                                                                                                 | 12 |

## 1. The Optimized Geometries of The Transition States with Selected Interatomic Distances

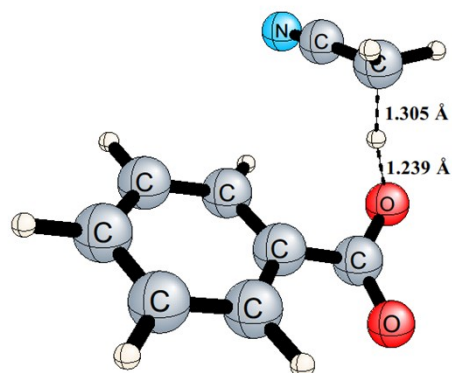

**Figure S1.** Computed structure of **2/5** at the B3LYP/6-311G(d,p) level (im. freq.= 1800i).

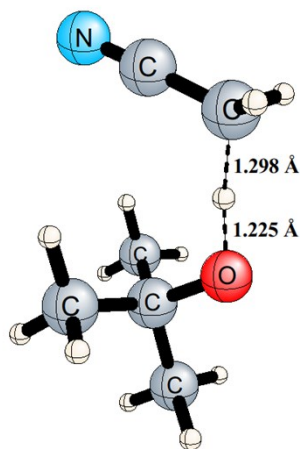

**Figure S2.** Computed structure of **3/5** at the B3LYP/6-311G(d,p) level (im. freq.= 1781i).

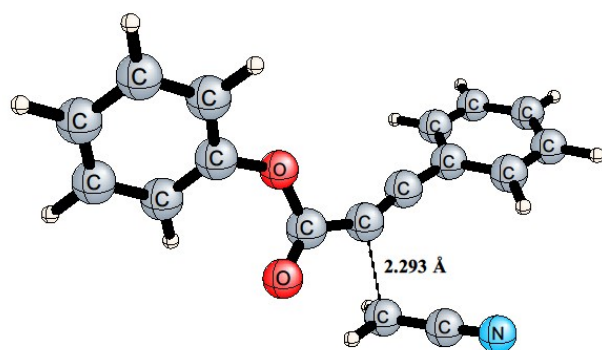

**Figure S3.** Computed structure of **8a/9a** at the B3LYP/6-311G(d,p) level (im. freq.= 422i).

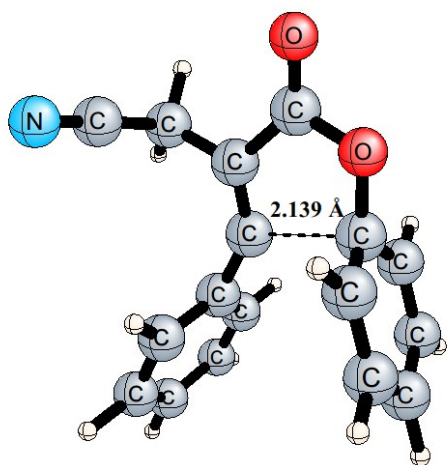

**Figure S4.** Computed structure of **9a/10a** at the B3LYP/6-311G(d,p) level (im. freq.= 436i).

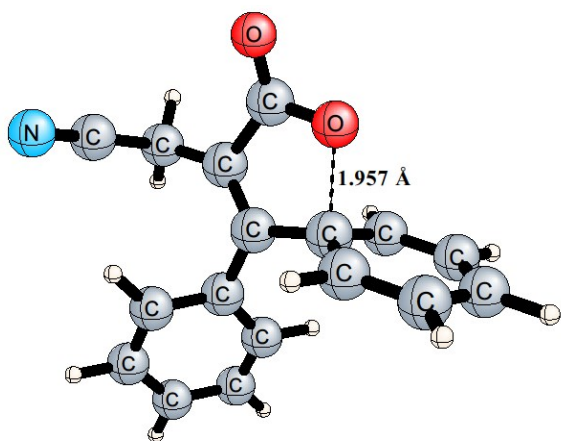

**Figure S5.** Computed structure of **10a/11a** at the B3LYP/6-311G(d,p) level (im. freq.= 328i).

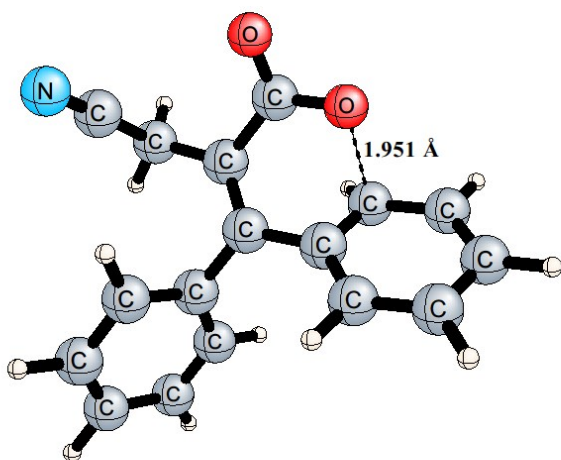

**Figure S6.** Computed structure of **11a/12a** at the B3LYP/6-311G(d,p) level (im. freq.= 326i).

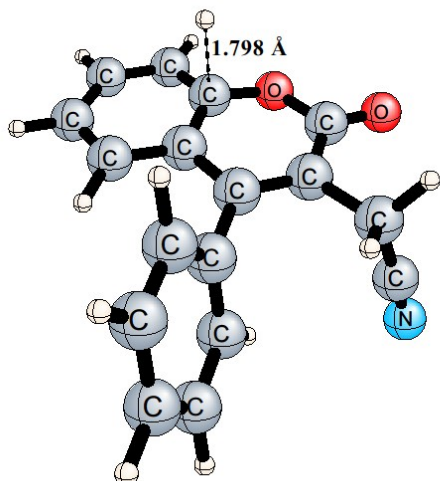

**Figure S7.** Computed structure of **12a/13a** at the B3LYP/6-311G(d,p) level (im. freq.= 924i).

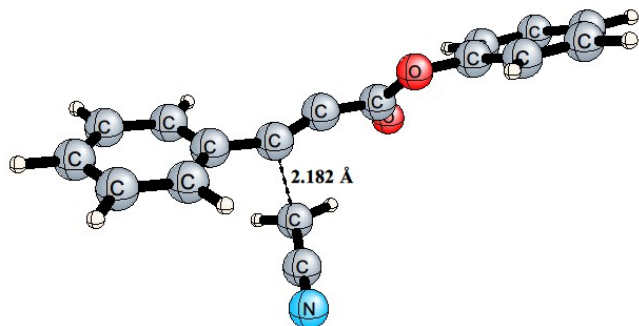

**Figure S8.** Computed structure of **8a/14a** at the B3LYP/6-311G(d,p) level (im. freq.= 575i).

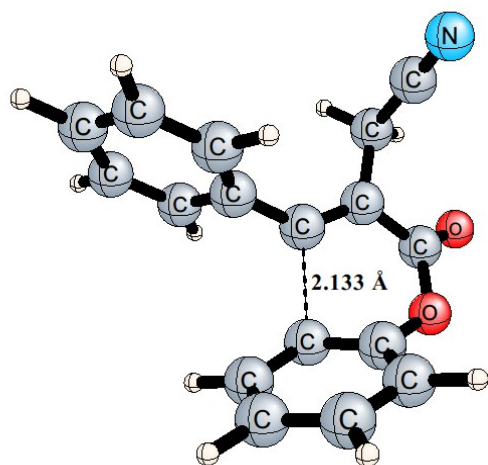

**Figure S9.** Computed structure of **9a/12a** at the B3LYP/6-311G(d,p) level (im. freq.= 426i).

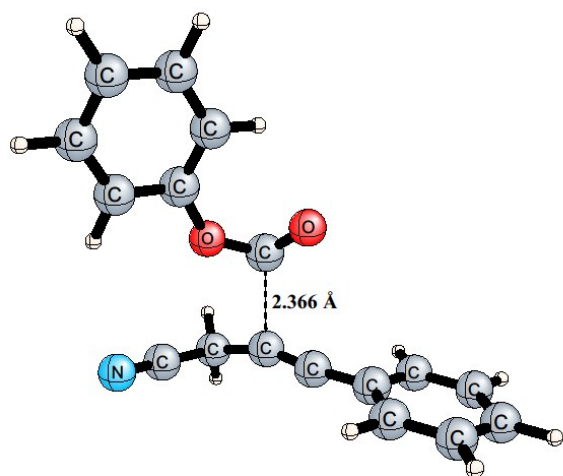

**Figure S10.** Computed structure of **9a/17a** at the B3LYP/6-311G(d,p) level (im. freq.= 333i).

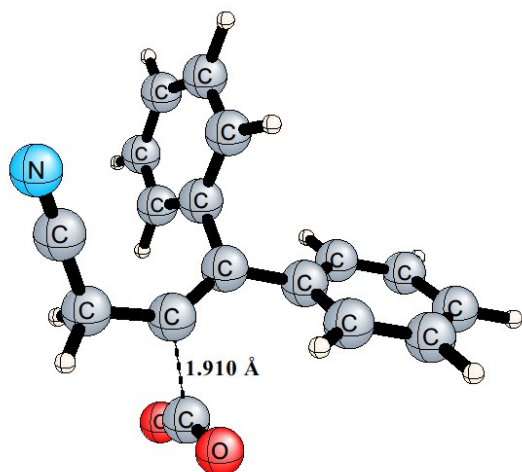

**Figure S11.** Computed structure of **11a/20a** at the B3LYP/6-311G(d,p) level (im. freq.= 423i).

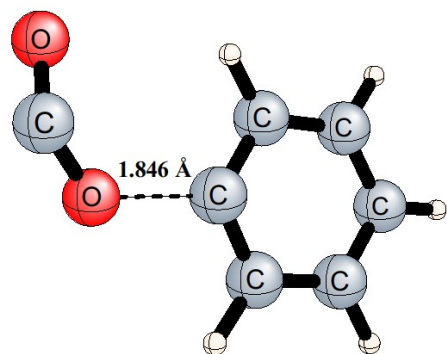

**Figure S12.** Computed structure of **17a/19a** at the B3LYP/6-311G(d,p) level (im. freq.= 668i).

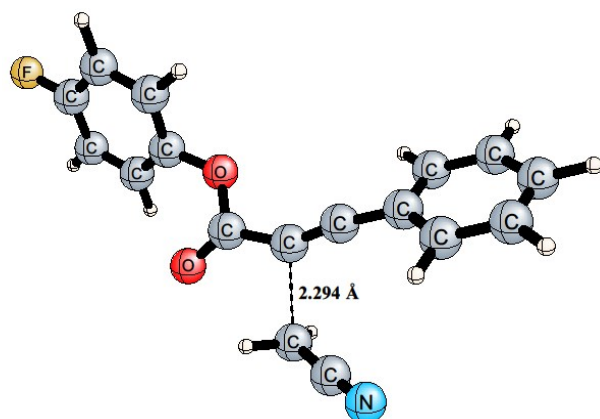

**Figure S13.** Computed structure of **8b/9b** at the B3LYP/6-311G(d,p) level (im. freq.= 420i).

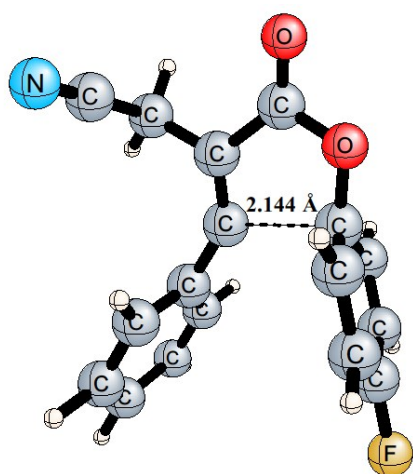

**Figure S14.** Computed structure of **9b/10b** at the B3LYP/6-311G(d,p) level (im. freq.= 432i).

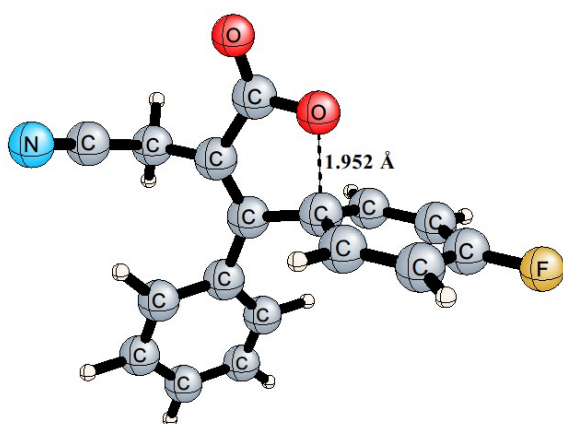

**Figure S15.** Computed structure of **10b/11b** at the B3LYP/6-311G(d,p) level (im. freq.= 315i).

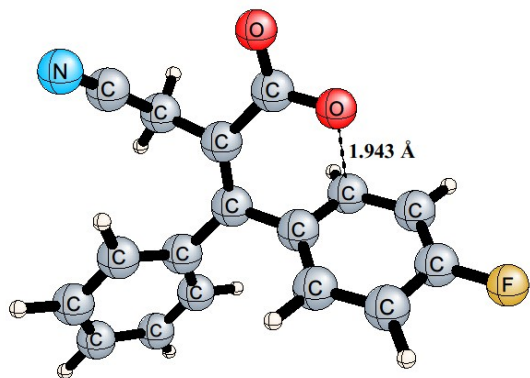

Figure S16. Computed structure of **11b/12b** at the B3LYP/6-311G(d,p) level (im. freq.= 337i).

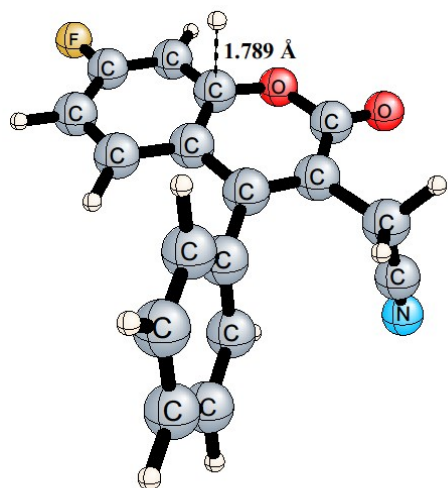

Figure S17. Computed structure of **12b/13b** at the B3LYP/6-311G(d,p) level (im. freq.= 945i).

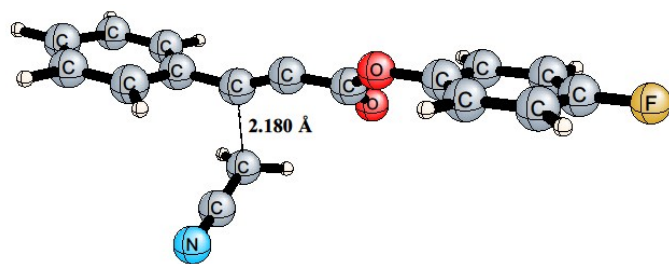

Figure S18. Computed structure of **8b/14b** at the B3LYP/6-311G(d,p) level (im. freq.= 573i).



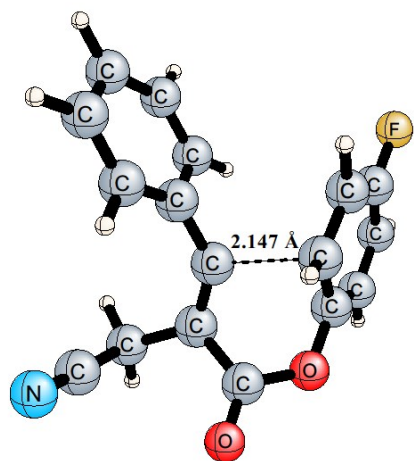

**Figure S19.** Computed structure of **9b/15b** at the B3LYP/6-311G(d,p) level (im. freq.= 402i).

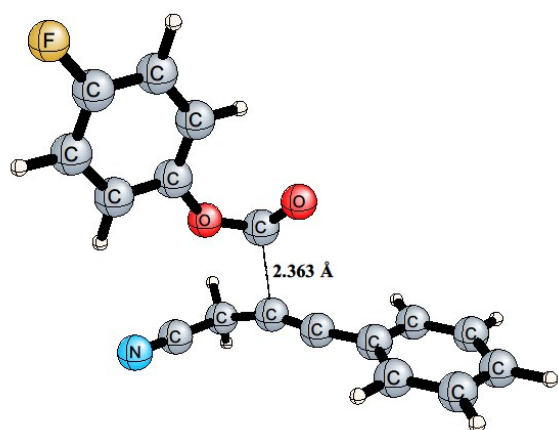

**Figure S20.** Computed structure of **9b/17b** at the B3LYP/6-311G(d,p) level (im. freq.= 335i).

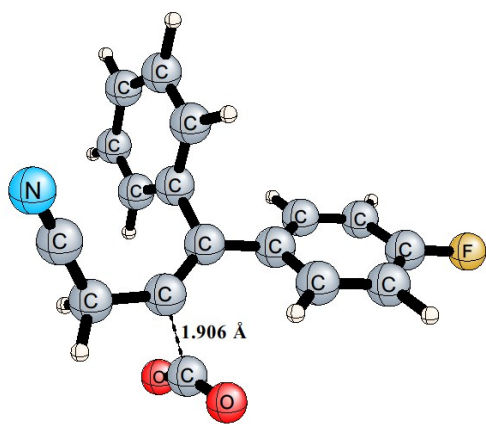

**Figure S21.** Computed structure of **11b/20b** at the B3LYP/6-311G(d,p) level (im. freq.= 423i).

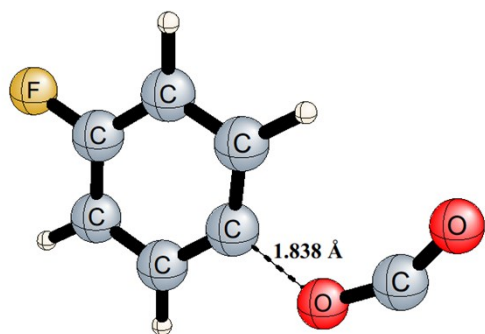

**Figure S22.** Computed structure of **17b/19b** at the B3LYP/6-311G(d,p) level (im. freq.= 677i).

## 2. Relative Free Energy Profile

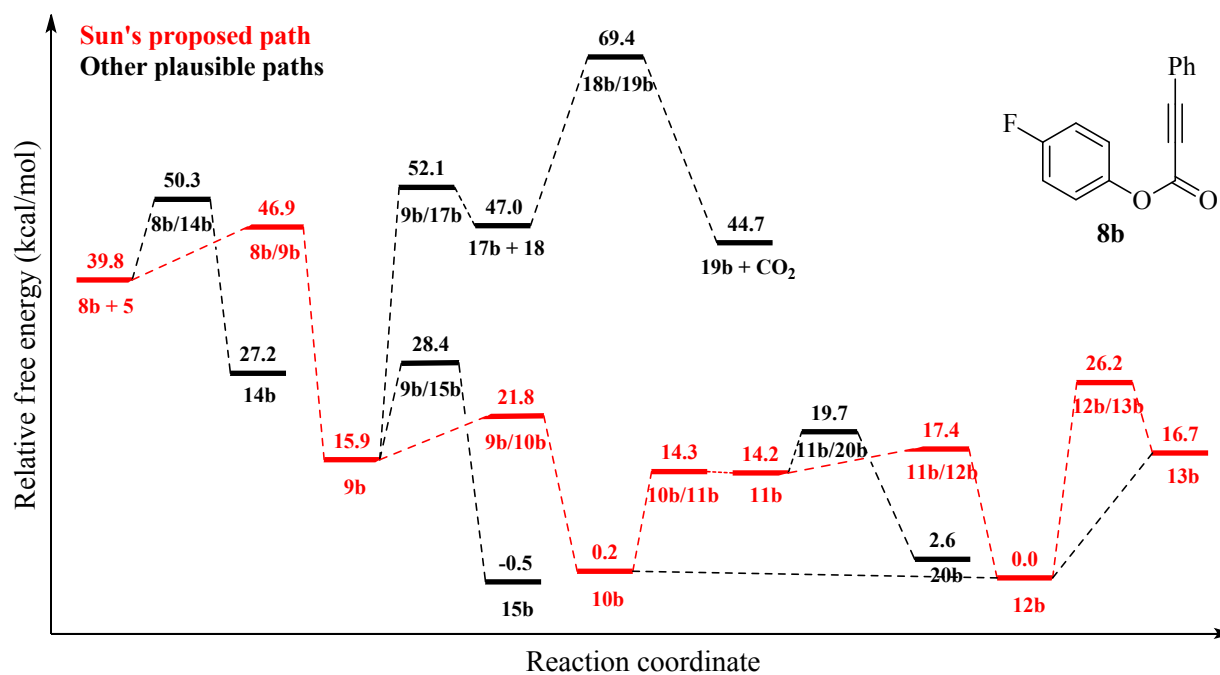

**Figure S23.** Relative free energy profile (at 403.15 K) for reaction mechanism of **8b** shown in Scheme 1 and Scheme 2 at the DLPNO-CCSD(T)/cc-PVTZ//B3LYP-6-311G(d,p) level.

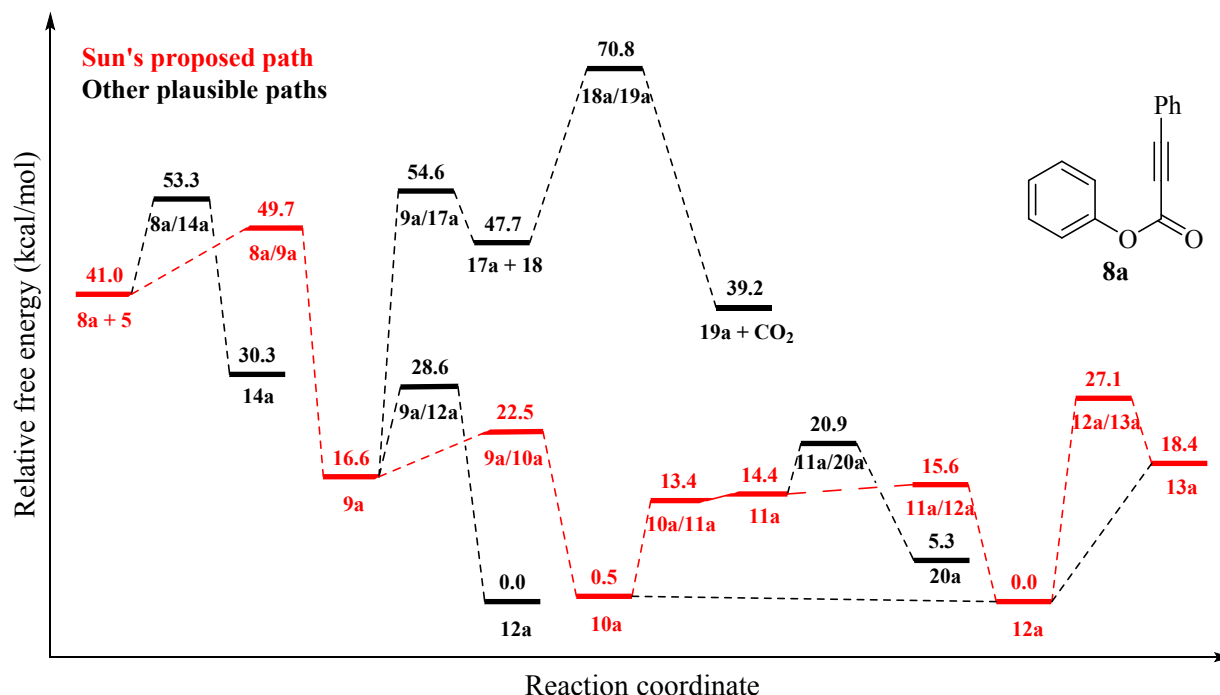

**Figure S24.** Solvent corrected relative free energy profile (at 403.15 K) for reaction mechanism of **8a** shown in Scheme 1 and Scheme 2 at the DLPNO-CCSD(T)/cc-PVTZ//B3LYP-6-311G(d,p) level.

### 3. Single Point Energy Computations

**Table 1.** Single point energies (**E**) for **a** using DLPNO-CCSD(T)/cc-PVTZ level in a.u.

| Molecule                     | E             | TS         | E             |
|------------------------------|---------------|------------|---------------|
| TBPB (1)                     | -652.10120961 | 2-TS-5     | -551.93690777 |
| Acetonitrile (4)             | -132.52638630 | 3-TS-5     | -365.11525645 |
| Benzoyloxy radical (2)       | -419.43595843 | 8a-TS-9a   | -858.56742562 |
| <i>t</i> -Butoxy radical (3) | -232.60660617 | 9a-TS-10a  | -858.61643941 |
| Cyanomethyl radical (5)      | -131.86284120 | 10a-TS-11a | -858.63089107 |
| Benzoic acid (6)             | -420.12251047 | 11a-TS-12a | -858.62854711 |
| <i>t</i> -Butanol (7)        | -233.28468445 | 12a-TS-13a | -858.60886867 |
| Carbon dioxide               | -188.32494069 | 8a-TS-14a  | -858.56132587 |
| 8a                           | -726.71193923 | 9a-TS-12a  | -858.60812417 |
| 9a                           | -858.62182698 | 9a-TS-17a  | -858.55866571 |
| 10a                          | -858.65529310 | 17a-TS-19a | -419.38884985 |
| 11a                          | -858.62808683 | 11a-TS-20a | -858.61620934 |
| 12a                          | -858.65776696 |            |               |
| 13a                          | -858.11949462 |            |               |
| 14a                          | -858.60564183 |            |               |

|     |               |  |  |
|-----|---------------|--|--|
| 17a | -419.42884684 |  |  |
| 18  | -439.13653423 |  |  |
| 19a | -231.11493779 |  |  |
| 20a | -670.31694238 |  |  |

**Table 2.** Single point energies (**E**) for **b** using DLPNO-CCSD(T)/cc-PVTZ level in a.u.

| <b>Molecule</b> | <b>E</b>      | <b>TS</b>  | <b>E</b>      |
|-----------------|---------------|------------|---------------|
| 8b              | -825.84206215 | 8b-TS-9b   | -957.69731796 |
| 9b              | -957.75234527 | 9b-TS-10b  | -957.74579114 |
| 10b             | -957.78536048 | 10b-TS-11b | -957.76257294 |
| 11b             | -957.75909622 | 11b-TS-12b | -957.75869674 |
| 12b             | -957.78761822 | 12b-TS-13b | -957.73846888 |
| 13b             | -957.24983067 | 8b-TS-14b  | -957.69107853 |
| 14b             | -957.73608087 | 9b-TS-15b  | -957.73826133 |
| 15b             | -957.78840884 | 9b-TS-17b  | -957.68863807 |
| 17b             | -518.55820144 | 17b-TS-19b | -518.51866408 |
| 19b             | -330.24314434 | 11b-TS-20b | -957.74668228 |
| 20b             | -769.44804201 |            |               |

#### 4. Cartesian coordinates for optimized structures

##### TBPB (1)

E= -653.3736766 a.u., number of negative frequencies = 0

0 1

|   |             |             |             |
|---|-------------|-------------|-------------|
| C | 0.30939800  | 1.44206500  | -0.38267400 |
| O | -0.95521000 | 1.04519700  | -0.76178400 |
| O | 0.46268400  | 2.63003800  | -0.27799000 |
| O | -1.24312000 | -0.37219600 | -0.53262700 |
| C | -2.47761100 | -0.46462900 | 0.24032300  |
| C | -3.63209300 | 0.15852700  | -0.54648900 |
| C | -2.63409400 | -1.98382800 | 0.35869300  |
| C | -2.29368300 | 0.18843700  | 1.61111500  |
| C | 1.39679000  | 0.44262300  | -0.18147300 |
| C | 2.42432700  | 0.81186600  | 0.69580700  |

|   |             |             |             |
|---|-------------|-------------|-------------|
| C | 3.51781900  | -0.02393500 | 0.88720800  |
| C | 3.61022300  | -1.22145100 | 0.17933300  |
| C | 2.60452500  | -1.57993200 | -0.71637000 |
| C | 1.49554700  | -0.75850800 | -0.89365700 |
| H | -4.57275100 | 0.02269200  | -0.00629400 |
| H | -3.46863700 | 1.22690000  | -0.69084200 |
| H | -3.72263600 | -0.31435600 | -1.52693000 |
| H | -3.54833600 | -2.21329500 | 0.91074000  |
| H | -1.78711900 | -2.42149000 | 0.89088900  |
| H | -2.70237600 | -2.44270000 | -0.62971100 |
| H | -2.14583100 | 1.26514200  | 1.51462900  |
| H | -3.18086000 | 0.02220900  | 2.22750200  |
| H | -1.43103000 | -0.24070900 | 2.12628200  |
| H | 2.35207500  | 1.75965800  | 1.21458300  |
| H | 4.30152300  | 0.26229700  | 1.57906600  |
| H | 4.46710500  | -1.87064800 | 0.32070700  |
| H | 2.68249800  | -2.50314900 | -1.27903600 |
| H | 0.71464600  | -1.04427000 | -1.58327400 |

#### Acetonitrile (4)

E= -132.7933298 a.u., number of negative frequencies = 0

0 1

|   |             |             |             |
|---|-------------|-------------|-------------|
| C | 1.17569200  | 0.00000200  | -0.00000300 |
| C | -0.28079500 | -0.00000300 | 0.00001100  |
| N | -1.43280100 | 0.00000000  | -0.00000600 |
| H | 1.55338100  | 1.02079100  | 0.08619700  |
| H | 1.55342100  | -0.58504200 | 0.84092300  |
| H | 1.55342100  | -0.43573800 | -0.92712900 |

#### Benzoyloxy radical (2)

E= -420.260907 a.u., number of negative frequencies = 0

0 2

|   |             |             |             |
|---|-------------|-------------|-------------|
| C | 1.71995000  | 0.00000000  | 0.00000000  |
| O | 2.43270100  | 1.03983300  | -0.00000100 |
| O | 2.43270100  | -1.03983300 | 0.00000100  |
| C | 0.24730100  | -0.00000100 | 0.00000000  |
| C | -0.44637600 | -1.21376200 | 0.00000000  |
| C | -1.83630700 | -1.21079600 | -0.00000100 |
| C | -2.52947500 | 0.00000000  | 0.00000000  |
| C | -1.83630600 | 1.21079600  | 0.00000100  |
| C | -0.44637700 | 1.21376200  | 0.00000100  |
| H | 0.10801800  | -2.14502600 | -0.00000100 |
| H | -2.38004100 | -2.14806900 | -0.00000100 |
| H | -3.61363600 | 0.00000100  | 0.00000000  |
| H | -2.38004100 | 2.14806900  | 0.00000100  |
| H | 0.10801900  | 2.14502500  | 0.00000100  |

### ***t*-Butoxy radical (3)**

E= -233.0734125 a.u., number of negative frequencies = 0

0 2

|   |             |             |             |
|---|-------------|-------------|-------------|
| C | -1.27729400 | -0.79209100 | -0.31533100 |
| C | 0.00000000  | -0.02726800 | 0.08075000  |
| C | 1.27730400  | -0.79207600 | -0.31533100 |
| C | -0.00000800 | 1.38913000  | -0.57752000 |
| O | -0.00000100 | 0.26102700  | 1.42838200  |
| H | -1.31474900 | -0.97073800 | -1.39364000 |
| H | -2.16158900 | -0.22497700 | -0.01828200 |
| H | -1.30490300 | -1.75933900 | 0.19251100  |
| H | 2.16159200  | -0.22494800 | -0.01829000 |
| H | 1.30492700  | -1.75932000 | 0.19251800  |
| H | 1.31475600  | -0.97073000 | -1.39363900 |
| H | 0.88868900  | 1.94698700  | -0.28035000 |

|   |             |            |             |
|---|-------------|------------|-------------|
| H | -0.88871700 | 1.94697400 | -0.28035700 |
| H | -0.00000300 | 1.26171100 | -1.66292700 |

### Cyanomethyl radical (5)

E= -132.1319245 a.u., number of negative frequencies = 0

0 2

|   |             |             |             |
|---|-------------|-------------|-------------|
| C | -1.19098500 | 0.00000000  | -0.00000100 |
| C | 0.18740100  | -0.00000200 | 0.00000200  |
| N | 1.35581400  | 0.00000100  | -0.00000100 |
| H | -1.73460100 | -0.93498100 | 0.00000100  |
| H | -1.73459600 | 0.93498900  | 0.00000100  |

### Benzoic acid (6)

E= -420.9394630 a.u., number of negative frequencies = 0

0 1

|   |             |             |             |
|---|-------------|-------------|-------------|
| C | 1.70337200  | 0.12419200  | -0.00000100 |
| O | 2.33215300  | 1.15557700  | -0.00001800 |
| C | 0.21927100  | 0.02927400  | -0.00000100 |
| C | -0.51352500 | 1.22085600  | 0.00000700  |
| C | -1.90254900 | 1.18337900  | 0.00000700  |
| C | -2.56638000 | -0.04353400 | 0.00000100  |
| C | -1.83913100 | -1.23296500 | -0.00000700 |
| C | -0.44828600 | -1.20043400 | -0.00000800 |
| H | 0.02457600  | 2.16058100  | 0.00001000  |
| H | -2.46865700 | 2.10768400  | 0.00001300  |
| H | -3.65031900 | -0.07251200 | 0.00000200  |
| H | -2.35631100 | -2.18555800 | -0.00001400 |
| H | 0.12420800  | -2.11853500 | -0.00001300 |
| O | 2.31121400  | -1.08867100 | 0.00001500  |
| H | 3.26293800  | -0.91151300 | 0.00003000  |

### ***t*-Butanol (7)**

E= -233.7466102 a.u., number of negative frequencies = 0

0 1

|   |             |             |             |
|---|-------------|-------------|-------------|
| C | 0.69027800  | -1.26460200 | -0.51005900 |
| C | -0.00583100 | 0.00000000  | 0.01129300  |
| C | 0.69027200  | 1.26460500  | -0.51005800 |
| C | -1.48967300 | -0.00000300 | -0.35681500 |
| H | 0.65292700  | -1.32316900 | -1.60172900 |
| H | 0.21075100  | -2.15446200 | -0.09612500 |
| H | 1.74439500  | -1.27584700 | -0.21218300 |
| H | 0.21074100  | 2.15446300  | -0.09612400 |
| H | 1.74438900  | 1.27585400  | -0.21218200 |
| H | 0.65292200  | 1.32317300  | -1.60172900 |
| H | -1.97890000 | 0.88434400  | 0.05759300  |
| H | -1.97889600 | -0.88435200 | 0.05759200  |
| H | -1.62489000 | -0.00000300 | -1.44116700 |
| O | 0.01498200  | 0.00000000  | 1.45113100  |
| H | 0.93642500  | 0.00000100  | 1.73083900  |

### **Carbondioxide**

E= -188.6411388 a.u., number of negative frequencies = 0

0 1

|   |            |            |             |
|---|------------|------------|-------------|
| C | 0.00000000 | 0.00000000 | 0.00000000  |
| O | 0.00000000 | 0.00000000 | 1.16043900  |
| O | 0.00000000 | 0.00000000 | -1.16043900 |

### **Phenyl radical (19a)**

E= -231.6194243 a.u., number of negative frequencies = 0

0 2

|   |             |             |            |
|---|-------------|-------------|------------|
| C | -1.22372300 | -0.77066900 | 0.00000000 |
| C | -1.21183000 | 0.63143700  | 0.00000000 |



|   |             |             |            |
|---|-------------|-------------|------------|
| C | 0.00000000  | 1.32199300  | 0.00000000 |
| C | 1.21183000  | 0.63143600  | 0.00000000 |
| C | 1.22372300  | -0.77066900 | 0.00000000 |
| C | -0.00000100 | -1.39605100 | 0.00000000 |
| H | -2.15769400 | -1.32152000 | 0.00000000 |
| H | -2.15030400 | 1.17607600  | 0.00000000 |
| H | 0.00000100  | 2.40602700  | 0.00000000 |
| H | 2.15030400  | 1.17607500  | 0.00000000 |
| H | 2.15769300  | -1.32152200 | 0.00000000 |

### 8a

E= -728.1911337 a.u., number of negative frequencies = 0

0 1

|   |             |             |             |
|---|-------------|-------------|-------------|
| C | 1.81463300  | -0.26830700 | 0.05547000  |
| C | 0.62549400  | -0.47896200 | 0.09557600  |
| C | -0.76895500 | -0.82414300 | 0.17162700  |
| O | -1.53188300 | 0.27974100  | -0.08150900 |
| O | -1.18954100 | -1.92270600 | 0.42236100  |
| C | 3.21415800  | -0.01974000 | 0.00311400  |
| C | 3.69947200  | 1.26519200  | -0.29799600 |
| C | 5.06767400  | 1.49964200  | -0.34916200 |
| C | 5.96681100  | 0.46265900  | -0.10179200 |
| C | 5.49419300  | -0.81467900 | 0.19818500  |
| C | 4.12792300  | -1.05942600 | 0.25133200  |
| C | -2.92874700 | 0.23185400  | -0.06000700 |
| C | -3.55077100 | 1.35719700  | 0.47245900  |
| C | -4.93982800 | 1.43720300  | 0.47037900  |
| C | -5.70005200 | 0.39704700  | -0.06076900 |
| C | -5.06170600 | -0.72057700 | -0.59342000 |
| C | -3.67136000 | -0.81466900 | -0.60064100 |
| H | 2.99480200  | 2.06518400  | -0.48911500 |

|   |             |             |             |
|---|-------------|-------------|-------------|
| H | 5.43437800  | 2.49257700  | -0.58223500 |
| H | 7.03378700  | 0.64968200  | -0.14253600 |
| H | 6.19233000  | -1.62105700 | 0.39066600  |
| H | 3.75270900  | -2.04862300 | 0.48308600  |
| H | -2.93715700 | 2.15316400  | 0.87586900  |
| H | -5.42569800 | 2.31293300  | 0.88500700  |
| H | -6.78207800 | 0.45756700  | -0.06073600 |
| H | -5.64672000 | -1.53282300 | -1.00945900 |
| H | -3.17861300 | -1.68663000 | -1.00349500 |

### 9a

E= -860.3591019 a.u., number of negative frequencies = 0

0 2

|   |             |             |             |
|---|-------------|-------------|-------------|
| C | 0.61417400  | 0.99238500  | -0.49144300 |
| C | -0.45703300 | 0.00545200  | -0.10921300 |
| O | -0.27515600 | -1.05637100 | 0.41380300  |
| O | -1.68575800 | 0.49742600  | -0.46377400 |
| C | 0.19742800  | 2.38164700  | -0.98435900 |
| C | 1.86882900  | 0.63598200  | -0.38804900 |
| C | -2.83648700 | -0.24324500 | -0.16043800 |
| C | -3.63906700 | -0.64014800 | -1.22163500 |
| C | -4.83001300 | -1.31266100 | -0.95619300 |
| C | -5.20295000 | -1.58432200 | 0.35802700  |
| C | -4.38381200 | -1.17717900 | 1.41001700  |
| C | -3.19363000 | -0.50068900 | 1.15762700  |
| C | 3.02571600  | -0.07031800 | -0.15378000 |
| C | 3.64407900  | -0.83605100 | -1.18801500 |
| C | 4.82309700  | -1.51365100 | -0.94329300 |
| C | 5.43285200  | -1.45528500 | 0.31541000  |
| C | 4.84241800  | -0.70615500 | 1.34006300  |
| C | 3.66336500  | -0.01956100 | 1.12296500  |

|   |             |             |             |
|---|-------------|-------------|-------------|
| C | -0.34798800 | 3.21366600  | 0.08898300  |
| N | -0.75985100 | 3.86642200  | 0.94478200  |
| H | 1.06633200  | 2.88839100  | -1.40832600 |
| H | -0.55835300 | 2.29086200  | -1.76793700 |
| H | -3.32949300 | -0.41790300 | -2.23549400 |
| H | -5.46355400 | -1.62397200 | -1.77866600 |
| H | -6.12907100 | -2.10850900 | 0.56277300  |
| H | -4.67126900 | -1.38371700 | 2.43439800  |
| H | -2.55213600 | -0.17770700 | 1.96681600  |
| H | 3.17046100  | -0.88345900 | -2.16068500 |
| H | 5.27639000  | -2.09812900 | -1.73589100 |
| H | 6.35759200  | -1.98990200 | 0.49649700  |
| H | 5.31052100  | -0.66490500 | 2.31698600  |
| H | 3.20298800  | 0.55634300  | 1.91578700  |

### 10a

E= -860.3753179 a.u., number of negative frequencies = 0

0 2

|   |             |             |             |
|---|-------------|-------------|-------------|
| C | 3.39232900  | -0.75087900 | -0.74052000 |
| C | 2.08125600  | -0.98696000 | -1.02817600 |
| C | 1.02689900  | -1.05908100 | 0.04171200  |
| C | 1.56785200  | -0.81344500 | 1.42063700  |
| C | 2.88702400  | -0.56343600 | 1.64792700  |
| C | 3.82352400  | -0.52179500 | 0.58743200  |
| C | -0.21731600 | -0.19111600 | -0.24529400 |
| C | -1.26278900 | -1.00627900 | -0.46112800 |
| C | -0.83269500 | -2.41700200 | -0.32963900 |
| O | 0.48876300  | -2.43401300 | -0.00143500 |
| O | -1.48911500 | -3.41011300 | -0.48525400 |
| C | -2.68995900 | -0.70896800 | -0.84018600 |
| C | -0.19921300 | 1.28144300  | -0.20577100 |

|   |             |             |             |
|---|-------------|-------------|-------------|
| C | -1.25319600 | 1.97757700  | 0.41150200  |
| C | -1.25632100 | 3.36778700  | 0.45742000  |
| C | -0.21182000 | 4.09068000  | -0.11387300 |
| C | 0.84324000  | 3.41290200  | -0.72127200 |
| C | 0.85622100  | 2.02305300  | -0.76069400 |
| C | -3.58037500 | -0.60909800 | 0.31847200  |
| N | -4.26561200 | -0.50355700 | 1.23920400  |
| H | 4.12102000  | -0.74621000 | -1.54401400 |
| H | 1.75045200  | -1.18868700 | -2.04063100 |
| H | 0.85353400  | -0.86737000 | 2.23376000  |
| H | 3.23013700  | -0.40460400 | 2.66433400  |
| H | 4.86973500  | -0.33469300 | 0.79394200  |
| H | -2.75661900 | 0.22442400  | -1.40560700 |
| H | -3.05307700 | -1.52398800 | -1.47381400 |
| H | -2.05485900 | 1.43092800  | 0.89215700  |
| H | -2.07382900 | 3.88386100  | 0.94741600  |
| H | -0.21607000 | 5.17412300  | -0.07975000 |
| H | 1.66212100  | 3.96797900  | -1.16448100 |
| H | 1.68158400  | 1.50984100  | -1.23552900 |

### 11a

E= -860.3641743 a.u., number of negative frequencies = 0

0 2

|   |            |             |             |
|---|------------|-------------|-------------|
| C | 1.28310300 | -0.58487900 | 0.00223200  |
| C | 1.57637900 | -1.63484400 | -0.88275700 |
| C | 2.74742500 | -2.36361800 | -0.74120500 |
| C | 3.63189200 | -2.08407400 | 0.30796400  |
| C | 3.33856700 | -1.07246700 | 1.21209400  |
| C | 2.17292300 | -0.32098000 | 1.06280000  |
| O | 2.45441000 | 1.73964700  | -0.39196200 |
| C | 1.29956800 | 2.29631000  | -0.50193900 |

|   |             |             |             |
|---|-------------|-------------|-------------|
| O | 1.29586200  | 3.47613300  | -0.87018800 |
| C | 0.03740900  | 1.54318400  | -0.24786200 |
| C | -1.19375500 | 2.43909900  | -0.21946300 |
| C | 0.02371700  | 0.19283600  | -0.14407500 |
| C | -1.23104000 | -0.60974500 | -0.16861300 |
| C | -1.50207200 | -1.52499100 | 0.85808700  |
| C | -2.66862400 | -2.28097800 | 0.84077800  |
| C | -3.56817600 | -2.15785900 | -0.21655500 |
| C | -3.29576600 | -1.27244900 | -1.25673400 |
| C | -2.13882000 | -0.49944700 | -1.23067000 |
| C | -2.01566500 | 2.26284400  | 0.97626400  |
| N | -2.65597000 | 2.14103400  | 1.92668600  |
| H | 0.88832800  | -1.86059100 | -1.68862100 |
| H | 2.97670100  | -3.15623100 | -1.44408200 |
| H | 4.53970100  | -2.66599800 | 0.41797900  |
| H | 4.00990900  | -0.86186800 | 2.03590800  |
| H | 1.92469600  | 0.44321200  | 1.78757300  |
| H | -1.82297400 | 2.30134800  | -1.10208200 |
| H | -0.84779800 | 3.47635200  | -0.25784500 |
| H | -0.80452300 | -1.62774500 | 1.68095600  |
| H | -2.87540500 | -2.96791800 | 1.65318400  |
| H | -4.47457300 | -2.75200200 | -0.23170400 |
| H | -3.98316000 | -1.18322300 | -2.09012800 |
| H | -1.92367900 | 0.17352400  | -2.05281300 |

### 12a

E= -860.3809100 a.u., number of negative frequencies = 0

0 2

|   |             |             |             |
|---|-------------|-------------|-------------|
| C | -1.17375200 | -0.77468600 | -0.02504100 |
| C | -2.44819100 | -0.10516200 | -0.46418800 |
| C | -3.69869800 | -0.75492800 | 0.02984800  |

|   |             |             |             |
|---|-------------|-------------|-------------|
| C | -3.67561600 | -1.99929300 | 0.56342600  |
| C | -2.44052600 | -2.68644600 | 0.77002300  |
| C | -1.22446000 | -2.05969800 | 0.50296700  |
| O | -2.49473800 | 1.29924000  | -0.10712900 |
| C | -1.37555000 | 2.04466600  | -0.31045000 |
| O | -1.45788800 | 3.24856200  | -0.30459100 |
| C | -0.08448500 | 1.33334700  | -0.46509600 |
| C | 1.08850900  | 2.23955100  | -0.78497200 |
| C | 0.02878900  | -0.01405300 | -0.22563800 |
| C | 1.35432200  | -0.69852800 | -0.15960600 |
| C | 1.68402900  | -1.68088000 | -1.10365200 |
| C | 2.92114100  | -2.31712400 | -1.05931500 |
| C | 3.83901000  | -1.99208500 | -0.06190700 |
| C | 3.51567500  | -1.02561300 | 0.88738200  |
| C | 2.28273500  | -0.37882500 | 0.83883500  |
| C | 1.65010900  | 2.89703000  | 0.39825600  |
| N | 2.10726800  | 3.38487800  | 1.33714300  |
| H | -2.46557900 | -0.12832200 | -1.57144100 |
| H | -4.61834400 | -0.19859200 | -0.10452300 |
| H | -4.60103500 | -2.47570700 | 0.86679400  |
| H | -2.44804100 | -3.68008800 | 1.20087400  |
| H | -0.29899400 | -2.56271300 | 0.75542700  |
| H | 1.88731600  | 1.67299500  | -1.26844600 |
| H | 0.75411700  | 3.02254200  | -1.46995300 |
| H | 0.97102900  | -1.93737300 | -1.87931900 |
| H | 3.16776400  | -3.06650500 | -1.80287600 |
| H | 4.80115300  | -2.49011600 | -0.02538400 |
| H | 4.22299000  | -0.76935300 | 1.66758700  |
| H | 2.03951700  | 0.37303100  | 1.57978000  |

**13a**

E= -859.8404632 a.u., number of negative frequencies = 0

0 1

|   |             |             |             |
|---|-------------|-------------|-------------|
| C | 1.20966400  | -0.74306600 | 0.05120000  |
| C | 2.43982300  | -0.06633500 | 0.00455000  |
| C | 3.64755700  | -0.72616700 | 0.22229800  |
| C | 3.63555100  | -2.08515100 | 0.49791100  |
| C | 2.42430400  | -2.78367300 | 0.56256800  |
| C | 1.22857000  | -2.12018400 | 0.34468900  |
| O | 2.50838300  | 1.27047500  | -0.25287200 |
| C | 1.38366300  | 2.04712600  | -0.46315400 |
| O | 1.53791500  | 3.21909900  | -0.68705300 |
| C | 0.08717700  | 1.36131000  | -0.41792800 |
| C | -1.10419300 | 2.26131900  | -0.68754900 |
| C | -0.00591000 | 0.02432500  | -0.17987300 |
| C | -1.32661000 | -0.67204300 | -0.14969900 |
| C | -2.21483800 | -0.47081000 | 0.91281700  |
| C | -3.44574200 | -1.12330700 | 0.93243500  |
| C | -3.80425000 | -1.97651900 | -0.10828300 |
| C | -2.92545900 | -2.17998200 | -1.17078900 |
| C | -1.69058600 | -1.53731600 | -1.18972200 |
| C | -1.60614600 | 2.90514800  | 0.52858300  |
| N | -2.00704800 | 3.38529800  | 1.49667000  |
| H | 4.56716400  | -0.15704100 | 0.17339000  |
| H | 4.57147700  | -2.60403400 | 0.66893600  |
| H | 2.42045900  | -3.84313500 | 0.78814500  |
| H | 0.29082700  | -2.65682400 | 0.40411000  |
| H | -0.80326300 | 3.04659600  | -1.38479200 |
| H | -1.92169700 | 1.69185200  | -1.13436400 |
| H | -1.94406100 | 0.19706800  | 1.72198800  |
| H | -4.12449000 | -0.95873300 | 1.76119900  |
| H | -4.76425700 | -2.47956900 | -0.09307300 |

|   |             |             |             |
|---|-------------|-------------|-------------|
| H | -3.20019600 | -2.83965100 | -1.98597300 |
| H | -1.00846200 | -1.69826700 | -2.01718300 |

### 14a

E= -860.3441893 a.u., number of negative frequencies = 0

0 2

|   |             |             |             |
|---|-------------|-------------|-------------|
| C | 2.44792200  | -2.01229100 | -1.17120200 |
| C | 1.73816000  | -0.72501100 | -0.71822100 |
| C | 0.43543800  | -0.66010800 | -0.87931500 |
| C | -0.79848300 | 0.07329000  | -0.83746000 |
| O | -1.73901100 | -0.63685200 | -0.16342500 |
| O | -0.96212900 | 1.15320800  | -1.36434400 |
| C | 2.56117100  | 0.37498900  | -0.13800800 |
| C | 2.17115800  | 1.71293000  | -0.30776900 |
| C | 2.93903700  | 2.74234700  | 0.22412600  |
| C | 4.10496600  | 2.45844800  | 0.93342300  |
| C | 4.50097500  | 1.13463200  | 1.10485900  |
| C | 3.73993000  | 0.09868700  | 0.57082500  |
| C | 2.71947700  | -2.94581000 | -0.07828200 |
| N | 2.93495200  | -3.68396200 | 0.78037700  |
| C | -3.05113600 | -0.21289500 | 0.05846000  |
| C | -3.68915200 | -0.89477900 | 1.09401900  |
| C | -5.01480000 | -0.60531900 | 1.39249700  |
| C | -5.70298700 | 0.36086100  | 0.65935000  |
| C | -5.05325200 | 1.03032900  | -0.37333200 |
| C | -3.72265000 | 0.75422100  | -0.68820800 |
| H | 1.82743900  | -2.52551700 | -1.90832600 |
| H | 3.39488300  | -1.75718100 | -1.65620200 |
| H | 1.27620800  | 1.94222900  | -0.87292700 |
| H | 2.62796400  | 3.77039400  | 0.07767600  |
| H | 4.70181500  | 3.26338400  | 1.34683100  |



|   |             |             |             |
|---|-------------|-------------|-------------|
| H | 5.40381100  | 0.90277900  | 1.65817100  |
| H | 4.05827500  | -0.92343200 | 0.73415200  |
| H | -3.13338100 | -1.64303100 | 1.64521600  |
| H | -5.50891100 | -1.13575300 | 2.19821300  |
| H | -6.73650700 | 0.58877600  | 0.89199400  |
| H | -5.58088700 | 1.78254000  | -0.94857900 |
| H | -3.22090100 | 1.28456300  | -1.48127200 |

### 17a

E= -420.2481714 a.u., number of negative frequencies = 0

0 2

|   |             |             |             |
|---|-------------|-------------|-------------|
| O | 1.43699100  | -0.58861600 | -0.18033400 |
| C | 0.08556100  | -0.22717900 | -0.07706000 |
| C | -0.80823400 | -1.28808100 | -0.00509000 |
| C | -2.17204700 | -1.01852800 | 0.06601300  |
| C | -2.63017700 | 0.29763400  | 0.06822600  |
| C | -1.71665500 | 1.34662700  | -0.00664900 |
| C | -0.34864400 | 1.09311900  | -0.08565200 |
| C | 2.38699300  | 0.30236200  | 0.15211600  |
| O | 3.55211000  | 0.12938100  | 0.08610600  |
| H | -0.42692900 | -2.30141400 | -0.00484200 |
| H | -2.87520800 | -1.84119000 | 0.12245400  |
| H | -3.69213800 | 0.50445900  | 0.12551200  |
| H | -2.06523100 | 2.37280700  | -0.00990500 |
| H | 0.36592000  | 1.90349400  | -0.15081500 |

### 18

E= -440.0612020 a.u., number of negative frequencies = 0

0 1

|   |            |             |            |
|---|------------|-------------|------------|
| C | 0.51924800 | -0.43661600 | 0.00000400 |
| C | 1.70363200 | -0.65629900 | 0.00000600 |

|   |             |             |             |
|---|-------------|-------------|-------------|
| C | 3.13891900  | -0.93385500 | 0.00001100  |
| C | 3.96227000  | 0.28183500  | -0.00000400 |
| N | 4.62007000  | 1.22690800  | -0.00001600 |
| C | -0.88227900 | -0.16364500 | 0.00000200  |
| C | -1.34603100 | 1.16270300  | 0.00000700  |
| C | -2.71045100 | 1.42730600  | 0.00000500  |
| C | -3.63011500 | 0.37955000  | -0.00000300 |
| C | -3.17856400 | -0.93930200 | -0.00000900 |
| C | -1.81587600 | -1.21346100 | -0.00000600 |
| H | 3.41312500  | -1.53075100 | 0.87795300  |
| H | 3.41312600  | -1.53077300 | -0.87791600 |
| H | -0.62869200 | 1.97431100  | 0.00001400  |
| H | -3.05692200 | 2.45445000  | 0.00000900  |
| H | -4.69350300 | 0.58973300  | -0.00000600 |
| H | -3.89001900 | -1.75722300 | -0.00001400 |
| H | -1.46213300 | -2.23740300 | -0.00001000 |

## 20a

E= -671.7355225 a.u., number of negative frequencies = 0

0 2

|   |             |             |             |
|---|-------------|-------------|-------------|
| C | 0.98658700  | -0.69063400 | 0.06886600  |
| C | 1.07234200  | -1.36678400 | -1.15579800 |
| C | 2.05095100  | -2.33407500 | -1.36049200 |
| C | 2.95418100  | -2.64647400 | -0.34455300 |
| C | 2.87201500  | -1.98634900 | 0.87836700  |
| C | 1.89476600  | -1.01324100 | 1.08353200  |
| C | 0.33245000  | 1.61634200  | 0.53897900  |
| C | 1.57526900  | 2.39961900  | 0.71547500  |
| C | -0.05081900 | 0.37920000  | 0.26920800  |
| C | -1.49179300 | 0.02072600  | 0.14300900  |
| C | -1.93291500 | -1.28357900 | 0.40405800  |

|   |             |             |             |
|---|-------------|-------------|-------------|
| C | -3.28459400 | -1.60683100 | 0.31596600  |
| C | -4.21727700 | -0.63592100 | -0.03936000 |
| C | -3.78872600 | 0.66418700  | -0.30793100 |
| C | -2.44068300 | 0.98897700  | -0.22013500 |
| C | 1.64645000  | 3.56178800  | -0.17857700 |
| N | 1.70532800  | 4.47478300  | -0.87846500 |
| H | 0.37188100  | -1.12625500 | -1.94728600 |
| H | 2.11045900  | -2.84400700 | -2.31548900 |
| H | 3.71436300  | -3.40229400 | -0.50573100 |
| H | 3.56402500  | -2.23062700 | 1.67652900  |
| H | 1.81965300  | -0.51436300 | 2.04352700  |
| H | 1.66315100  | 2.76170600  | 1.74716500  |
| H | 2.45594800  | 1.76646600  | 0.52914000  |
| H | -1.21583700 | -2.04590700 | 0.68387600  |
| H | -3.60808900 | -2.62013900 | 0.52642200  |
| H | -5.26871800 | -0.88972600 | -0.11247500 |
| H | -4.50645900 | 1.42429600  | -0.59564800 |
| H | -2.10689700 | 1.99566800  | -0.44445900 |

## 2-TS-5

E= -553.0321936 a.u., im. freq.= 1800.78i

0 2

|   |             |             |             |
|---|-------------|-------------|-------------|
| C | -0.17795100 | 1.75061000  | -0.25900800 |
| O | 1.14888100  | 1.81333300  | -0.24977400 |
| O | -0.75708200 | 2.81100600  | -0.41234600 |
| C | 2.55040700  | 0.14899400  | 1.04624700  |
| C | -0.88224100 | 0.44760200  | -0.12443500 |
| C | -0.32792800 | -0.74745200 | -0.59589000 |
| C | -1.04779100 | -1.93430600 | -0.49473900 |
| C | -2.31639600 | -1.93425200 | 0.08266600  |
| C | -2.87599700 | -0.74265900 | 0.54440500  |

|   |             |             |             |
|---|-------------|-------------|-------------|
| C | -2.16774700 | 0.44750000  | 0.43061000  |
| H | 0.64506800  | -0.74978100 | -1.07074700 |
| H | -0.61887600 | -2.85542100 | -0.87122100 |
| H | -2.87258300 | -2.86110700 | 0.16531000  |
| H | -3.86559700 | -0.74221700 | 0.98619100  |
| H | -2.59469500 | 1.38425600  | 0.76759800  |
| C | 3.07173900  | -0.88657800 | 0.22398900  |
| N | 3.46486100  | -1.72089900 | -0.47711200 |
| H | 1.78653900  | 0.91295300  | 0.31487100  |
| H | 3.29440900  | 0.86552600  | 1.39094300  |
| H | 1.88074400  | -0.19937400 | 1.83072300  |

### 3-TS-5

E= -365.8528882 a.u., im. freq.= 1781.29i

0 2

|   |             |             |             |
|---|-------------|-------------|-------------|
| C | 0.87069800  | 0.85742800  | 1.27226800  |
| C | 1.21860200  | 0.07002800  | 0.00000000  |
| C | 0.87070100  | 0.85734300  | -1.27232200 |
| C | 2.71947300  | -0.30766500 | 0.00001300  |
| H | 1.44504600  | 1.78625600  | 1.32464400  |
| H | 1.09537900  | 0.25828100  | 2.15748900  |
| H | -0.18935300 | 1.12147900  | 1.29002500  |
| H | 1.09538100  | 0.25813600  | -2.15750200 |
| H | -0.18935000 | 1.12139500  | -1.29009800 |
| H | 1.44505100  | 1.78616600  | -1.32475900 |
| H | 2.96437200  | -0.89399000 | -0.88707400 |
| H | 2.96437200  | -0.89392500 | 0.88714400  |
| H | 3.31969800  | 0.60605900  | -0.00002000 |
| C | -1.92749700 | -1.24890300 | 0.00001000  |
| H | -2.10884100 | -1.82149700 | 0.90823200  |
| H | -2.10882100 | -1.82150000 | -0.90821400 |

|   |             |             |             |
|---|-------------|-------------|-------------|
| O | 0.59076800  | -1.20189500 | 0.00004200  |
| H | -0.63295600 | -1.14764000 | 0.00002700  |
| C | -2.54477300 | 0.03595000  | 0.00000100  |
| N | -3.00990800 | 1.09583600  | -0.00000600 |

### 8a-TS-9a

E= -860.3121907 a.u., im. freq.= 422.92i

0 2

|   |             |             |             |
|---|-------------|-------------|-------------|
| C | 0.42015100  | 0.75524300  | -0.23846100 |
| C | -1.02614300 | 0.92268900  | -0.09224800 |
| O | -1.61485400 | 1.96016600  | 0.06207100  |
| O | -1.61986600 | -0.30261700 | -0.16145400 |
| C | 1.09737200  | 2.90263000  | -0.67258900 |
| C | 1.38408100  | -0.01182900 | -0.16433700 |
| C | -3.00718800 | -0.44152100 | -0.01745900 |
| C | -3.42349700 | -1.48348400 | 0.80356700  |
| C | -4.78448500 | -1.74337000 | 0.93763700  |
| C | -5.71658900 | -0.96410200 | 0.25561300  |
| C | -5.28087300 | 0.07388700  | -0.56539600 |
| C | -3.92198700 | 0.34396600  | -0.71160400 |
| C | 2.60968200  | -0.70720200 | -0.10715300 |
| C | 2.87037200  | -1.75980600 | -1.00991600 |
| C | 4.07514900  | -2.44447600 | -0.94957000 |
| C | 5.03154200  | -2.09978700 | 0.00702900  |
| C | 4.78168900  | -1.06090400 | 0.90437100  |
| C | 3.58320000  | -0.36314600 | 0.85487700  |
| C | 2.21069300  | 3.11526800  | 0.14867600  |
| N | 3.13086800  | 3.23800500  | 0.84832500  |
| H | 1.27072300  | 2.76958700  | -1.73248900 |
| H | 0.14108500  | 3.29885300  | -0.35857200 |
| H | -2.67889900 | -2.07647500 | 1.31998000  |

|   |             |             |             |
|---|-------------|-------------|-------------|
| H | -5.11349400 | -2.55467700 | 1.57656600  |
| H | -6.77616700 | -1.16486600 | 0.36194300  |
| H | -6.00122200 | 0.68299700  | -1.09920100 |
| H | -3.58411800 | 1.15479100  | -1.34040100 |
| H | 2.12008500  | -2.02529100 | -1.74451800 |
| H | 4.27032100  | -3.25085800 | -1.64689200 |
| H | 5.97105000  | -2.63858800 | 0.05092600  |
| H | 5.52811200  | -0.78762000 | 1.64084900  |
| H | 3.39518700  | 0.46137900  | 1.53038600  |

### 9a-TS-10a

E= -860.3455089 a.u., im. freq.= 436.52i

0 2

|   |             |             |             |
|---|-------------|-------------|-------------|
| C | 1.85971300  | -2.64550300 | -0.62919300 |
| C | 0.52917800  | -2.41669700 | -0.92119200 |
| C | -0.33352000 | -1.91585600 | 0.09434400  |
| C | 0.12381300  | -1.90293400 | 1.44321800  |
| C | 1.45883900  | -2.13483500 | 1.70922800  |
| C | 2.34138900  | -2.48407000 | 0.67746800  |
| C | -0.35793400 | 0.18106600  | -0.32791200 |
| C | -1.65917000 | 0.29649100  | -0.49495700 |
| C | -2.46392800 | -0.95104200 | -0.39902700 |
| O | -1.71081700 | -2.05855700 | -0.11436000 |
| O | -3.64732200 | -1.03921200 | -0.56404700 |
| C | -2.42798800 | 1.58094700  | -0.78213700 |
| C | 0.81893300  | 0.98607900  | -0.28453700 |
| C | 1.13404800  | 1.72931400  | 0.87381800  |
| C | 2.29121800  | 2.49495900  | 0.92055100  |
| C | 3.15679300  | 2.53511300  | -0.17304300 |
| C | 2.85813400  | 1.80078100  | -1.32141400 |
| C | 1.70800200  | 1.02552600  | -1.37970600 |

|   |             |             |             |
|---|-------------|-------------|-------------|
| C | -2.75615200 | 2.30579700  | 0.44529300  |
| N | -2.99058100 | 2.87013200  | 1.42266500  |
| H | 2.52909500  | -2.98322700 | -1.41216500 |
| H | 0.12414700  | -2.57693700 | -1.91282300 |
| H | -0.58445900 | -1.67208700 | 2.22933500  |
| H | 1.81886400  | -2.07653900 | 2.72993100  |
| H | 3.38486100  | -2.67332900 | 0.89754500  |
| H | -1.83990300 | 2.23746800  | -1.42747200 |
| H | -3.35869800 | 1.32840200  | -1.29665000 |
| H | 0.45697100  | 1.70769100  | 1.71896100  |
| H | 2.51586100  | 3.06900200  | 1.81223900  |
| H | 4.05722200  | 3.13688700  | -0.13160500 |
| H | 3.52673100  | 1.83204500  | -2.17424600 |
| H | 1.48028500  | 0.45103000  | -2.26926900 |

### 10a-TS-11a

E= -860.3616738 a.u., im. freq.= 328.79i

0 2

|   |             |             |             |
|---|-------------|-------------|-------------|
| C | 3.49507400  | 0.88386200  | -0.78466100 |
| C | 2.24077500  | 0.37330700  | -1.03620400 |
| C | 1.37155200  | -0.00432500 | 0.04558700  |
| C | 1.80456700  | 0.30268000  | 1.37963600  |
| C | 3.06411900  | 0.80744400  | 1.61012000  |
| C | 3.91995900  | 1.09502000  | 0.53531000  |
| C | -0.10838000 | -0.16824800 | -0.20938100 |
| C | -0.50642600 | -1.43076400 | -0.44180500 |
| C | 0.58788500  | -2.44369700 | -0.35194500 |
| O | 1.75006900  | -1.92327900 | -0.02331800 |
| O | 0.43368800  | -3.63181300 | -0.56397900 |
| C | -1.87452000 | -1.94184800 | -0.82224300 |
| C | -0.95657900 | 1.04576600  | -0.16392300 |

|   |             |             |             |
|---|-------------|-------------|-------------|
| C | -2.22816900 | 1.01653300  | 0.43298000  |
| C | -3.02071700 | 2.15969500  | 0.47299900  |
| C | -2.56328300 | 3.35285200  | -0.08071500 |
| C | -1.29810000 | 3.40018900  | -0.66298700 |
| C | -0.49870900 | 2.26320400  | -0.69505900 |
| C | -2.67208400 | -2.36459500 | 0.33054300  |
| N | -3.30366800 | -2.66436100 | 1.24708700  |
| H | 4.15580500  | 1.12379600  | -1.60937500 |
| H | 1.90555100  | 0.19603900  | -2.05102600 |
| H | 1.13126200  | 0.09056400  | 2.20100200  |
| H | 3.39318400  | 0.99478200  | 2.62542000  |
| H | 4.91001200  | 1.49226600  | 0.72596300  |
| H | -2.44002000 | -1.18648400 | -1.37421100 |
| H | -1.73301900 | -2.81582700 | -1.46562500 |
| H | -2.58684300 | 0.11035700  | 0.90389100  |
| H | -3.99432300 | 2.11641800  | 0.94738200  |
| H | -3.18306500 | 4.24159200  | -0.04996500 |
| H | -0.92991200 | 4.32622500  | -1.08961800 |
| H | 0.48520900  | 2.31907400  | -1.14457400 |

### 11a-TS-12a

E= -860.3603932 a.u., im. freq.= 326.29i

0 2

|   |             |             |             |
|---|-------------|-------------|-------------|
| C | -1.19473500 | -0.75079700 | -0.01033500 |
| C | -2.35300000 | -0.37959500 | -0.76746500 |
| C | -3.60245900 | -1.00087800 | -0.48058300 |
| C | -3.69586000 | -1.92166400 | 0.53649900  |
| C | -2.55005600 | -2.28902000 | 1.27028600  |
| C | -1.31310900 | -1.71269100 | 0.99115900  |
| O | -2.48467200 | 1.46913600  | -0.15692900 |
| C | -1.34085100 | 2.10638100  | -0.24696400 |



|   |             |             |             |
|---|-------------|-------------|-------------|
| O | -1.31400500 | 3.32217800  | -0.14044300 |
| C | -0.05389100 | 1.34808500  | -0.44560800 |
| C | 1.12195400  | 2.24419800  | -0.79452700 |
| C | 0.04625100  | 0.00994500  | -0.23652400 |
| C | 1.33122100  | -0.74143500 | -0.19113500 |
| C | 1.48695700  | -1.88983000 | -0.98351300 |
| C | 2.67699800  | -2.60879900 | -0.96542500 |
| C | 3.72397600  | -2.20727900 | -0.13683400 |
| C | 3.57330400  | -1.08267700 | 0.67044300  |
| C | 2.38788100  | -0.35151900 | 0.64355500  |
| C | 1.72106400  | 2.90610700  | 0.36614200  |
| N | 2.22119800  | 3.39080900  | 1.28458200  |
| H | -2.20289100 | 0.01546900  | -1.76410200 |
| H | -4.46793000 | -0.73555100 | -1.07478700 |
| H | -4.64764100 | -2.38879600 | 0.76130300  |
| H | -2.63449800 | -3.01711800 | 2.06841600  |
| H | -0.44275500 | -1.98457700 | 1.57581400  |
| H | 1.90358200  | 1.67006900  | -1.29721300 |
| H | 0.77314300  | 3.02697700  | -1.47333900 |
| H | 0.67373600  | -2.21060300 | -1.62484100 |
| H | 2.78633800  | -3.48438400 | -1.59518400 |
| H | 4.64936500  | -2.77149500 | -0.11729500 |
| H | 4.37746200  | -0.77036000 | 1.32659900  |
| H | 2.27924800  | 0.51300600  | 1.28650400  |

### 12a-TS-13a

E= -860.3341476 a.u., im. freq.= 924.67i

0 2

|   |            |             |             |
|---|------------|-------------|-------------|
| C | 1.18830100 | -0.74057400 | -0.05164600 |
| C | 2.43345900 | -0.06593700 | 0.09025500  |
| C | 3.64591200 | -0.70718600 | -0.24980600 |

|   |             |             |             |
|---|-------------|-------------|-------------|
| C | 3.63411100  | -2.05060900 | -0.56152100 |
| C | 2.42205500  | -2.75815200 | -0.60759000 |
| C | 1.22132700  | -2.10825200 | -0.36878100 |
| O | 2.48770900  | 1.29790600  | 0.19322400  |
| C | 1.35738200  | 2.05929500  | 0.42146600  |
| O | 1.49587600  | 3.24124400  | 0.59615300  |
| C | 0.06719500  | 1.35779300  | 0.41989400  |
| C | -1.12530500 | 2.25004900  | 0.70864700  |
| C | -0.02504900 | 0.02012600  | 0.17249100  |
| C | -1.34360500 | -0.68009400 | 0.13988200  |
| C | -1.69209000 | -1.56736400 | 1.16689300  |
| C | -2.92489500 | -2.21379200 | 1.15015300  |
| C | -3.81691000 | -1.99258400 | 0.10219500  |
| C | -3.47384800 | -1.11781600 | -0.92577200 |
| C | -2.24517300 | -0.46098900 | -0.90775400 |
| C | -1.64730000 | 2.89774000  | -0.49711000 |
| N | -2.06495800 | 3.37982200  | -1.45710200 |
| H | 2.56643100  | -0.42115200 | 1.84812900  |
| H | 4.55734900  | -0.12421700 | -0.22261200 |
| H | 4.56507000  | -2.55605400 | -0.78942400 |
| H | 2.42160700  | -3.81148200 | -0.86015400 |
| H | 0.28778300  | -2.64955900 | -0.44867600 |
| H | -1.93351200 | 1.67352200  | 1.16326300  |
| H | -0.82017700 | 3.03362300  | 1.40593100  |
| H | -0.99931700 | -1.74157700 | 1.98280300  |
| H | -3.18783900 | -2.89006300 | 1.95555300  |
| H | -4.77530800 | -2.49875700 | 0.08842200  |
| H | -4.16292600 | -0.93980800 | -1.74314700 |
| H | -1.98654300 | 0.22365800  | -1.70676700 |

**8a-TS-14a**

E= -860.3042218 a.u., im. freq.= 575.67i

0 2

|   |             |             |             |
|---|-------------|-------------|-------------|
| C | 1.66981100  | 1.60018600  | 1.51654300  |
| C | 1.52587600  | -0.20052800 | 0.29238200  |
| C | 0.31493600  | -0.47095500 | 0.26347100  |
| C | -1.06475600 | -0.29391700 | 0.64287800  |
| O | -1.88164400 | -0.51387200 | -0.41565600 |
| O | -1.41232500 | 0.01119400  | 1.75834000  |
| C | 2.89755800  | -0.49115000 | -0.06946200 |
| C | 3.61277900  | -1.46202700 | 0.64788600  |
| C | 4.92498700  | -1.75966500 | 0.29717800  |
| C | 5.53799500  | -1.08864100 | -0.75972100 |
| C | 4.83270100  | -0.11829800 | -1.46908500 |
| C | 3.51811400  | 0.18420500  | -1.12998400 |
| C | 1.89702500  | 2.64409000  | 0.60543100  |
| N | 2.08726100  | 3.47106200  | -0.18838400 |
| C | -3.27223900 | -0.36538300 | -0.33440500 |
| C | -3.87343700 | 0.14857900  | -1.47898700 |
| C | -5.25849400 | 0.26959000  | -1.52609600 |
| C | -6.03280800 | -0.12262300 | -0.43569500 |
| C | -5.41396000 | -0.63981300 | 0.69982400  |
| C | -4.02759800 | -0.76860000 | 0.76309300  |
| H | 0.70229000  | 1.55645800  | 2.00149700  |
| H | 2.51773200  | 1.26935300  | 2.10402400  |
| H | 3.13149000  | -1.98228000 | 1.46736100  |
| H | 5.46883500  | -2.51676100 | 0.85030400  |
| H | 6.56185700  | -1.32100000 | -1.02905500 |
| H | 5.30586100  | 0.40674500  | -2.29062400 |
| H | 2.97156600  | 0.94224100  | -1.67627400 |
| H | -3.24874800 | 0.44207500  | -2.31337900 |
| H | -5.73004800 | 0.67092100  | -2.41553400 |

|   |             |             |             |
|---|-------------|-------------|-------------|
| H | -7.11163000 | -0.02694200 | -0.47126100 |
| H | -6.01070700 | -0.94800500 | 1.55057700  |
| H | -3.54851800 | -1.15912100 | 1.64805800  |

### 9a-TS-12a

E= -860.3378689 a.u., im. freq.= 426.27i

0 2

|   |             |             |             |
|---|-------------|-------------|-------------|
| C | 0.86218100  | 1.60141600  | -0.93236600 |
| C | 1.99733900  | 1.26108200  | -0.15409000 |
| C | 2.30335400  | 1.91100300  | 1.02334900  |
| C | 1.49630900  | 2.97436700  | 1.44360100  |
| C | 0.39405300  | 3.36936900  | 0.67391300  |
| C | 0.09529500  | 2.72257000  | -0.51195900 |
| O | 2.78830800  | 0.20647000  | -0.57087500 |
| C | 2.24777500  | -1.04014300 | -0.77531900 |
| O | 2.97761500  | -1.92957000 | -1.11604000 |
| C | 0.78155600  | -1.23653300 | -0.53743700 |
| C | 0.38428700  | -2.70664600 | -0.36859000 |
| C | -0.10952000 | -0.25514300 | -0.53363700 |
| C | -1.52854100 | -0.17635500 | -0.32010600 |
| C | -2.40799900 | 0.09958300  | -1.38633600 |
| C | -3.77414300 | 0.20794300  | -1.16082700 |
| C | -4.28950100 | 0.06607400  | 0.12830700  |
| C | -3.42722600 | -0.19111100 | 1.19354700  |
| C | -2.05920700 | -0.31015400 | 0.97885500  |
| C | 0.54810400  | -3.16255300 | 1.01121000  |
| N | 0.66474900  | -3.49650200 | 2.10847700  |
| H | 0.85370000  | 1.32064700  | -1.97982700 |
| H | 3.15955400  | 1.58352100  | 1.59977600  |
| H | 1.73088800  | 3.49341900  | 2.36490000  |
| H | -0.21157700 | 4.20854300  | 0.99613300  |

|   |             |             |             |
|---|-------------|-------------|-------------|
| H | -0.73373500 | 3.05489600  | -1.12451300 |
| H | -0.65853800 | -2.84689200 | -0.65928800 |
| H | 1.01509300  | -3.31946800 | -1.01649500 |
| H | -2.01174900 | 0.21259000  | -2.38919600 |
| H | -4.44073800 | 0.40529800  | -1.99276300 |
| H | -5.35570700 | 0.15600700  | 0.30047600  |
| H | -3.82163800 | -0.30442100 | 2.19690700  |
| H | -1.39088000 | -0.51243000 | 1.80717800  |

### 9a-TS-17a

E= -860.3007207 a.u., im. freq.= 333.66i

0 2

|   |             |             |             |
|---|-------------|-------------|-------------|
| C | 1.04575200  | 1.48325700  | -0.64874000 |
| C | -0.51448700 | -0.28706600 | -0.81589400 |
| O | -0.20614200 | -1.42598300 | -0.71166200 |
| O | -1.70076400 | 0.31206800  | -0.67740800 |
| C | 0.18165500  | 2.64060300  | -0.96278200 |
| C | 2.09568900  | 0.93494000  | -0.34271000 |
| C | -2.86751700 | -0.37389900 | -0.24285700 |
| C | -3.74092700 | 0.39068200  | 0.52052500  |
| C | -4.93473000 | -0.18325700 | 0.94813700  |
| C | -5.24061400 | -1.50158200 | 0.61344300  |
| C | -4.34775300 | -2.24669100 | -0.15252500 |
| C | -3.14768700 | -1.68846500 | -0.59312900 |
| C | 3.20785900  | 0.12906900  | -0.00517300 |
| C | 4.05072500  | -0.38650200 | -1.01033100 |
| C | 5.14439900  | -1.17118300 | -0.67187900 |
| C | 5.41961100  | -1.45662200 | 0.66584000  |
| C | 4.59129800  | -0.95179500 | 1.66871000  |
| C | 3.49529100  | -0.16482900 | 1.34313400  |
| C | -0.64251400 | 3.07334800  | 0.17083100  |

|   |             |             |             |
|---|-------------|-------------|-------------|
| N | -1.29745300 | 3.42800400  | 1.04941100  |
| H | 0.80733700  | 3.48539700  | -1.27069700 |
| H | -0.48958300 | 2.41245600  | -1.79519400 |
| H | -3.47312700 | 1.40906600  | 0.77389200  |
| H | -5.62287100 | 0.40240600  | 1.54652500  |
| H | -6.17009300 | -1.94620100 | 0.94924500  |
| H | -4.58005600 | -3.27222700 | -0.41537800 |
| H | -2.44939500 | -2.26627000 | -1.18064500 |
| H | 3.83086400  | -0.16682800 | -2.04785300 |
| H | 5.78403000  | -1.56499900 | -1.45346800 |
| H | 6.27418900  | -2.07076500 | 0.92535800  |
| H | 4.80080100  | -1.17440100 | 2.70870800  |
| H | 2.84901400  | 0.22760300  | 2.11858700  |

### 17a-TS-19a

E= -420.2179641 a.u., im. freq.= 668.35i

0 2

|   |             |             |             |
|---|-------------|-------------|-------------|
| C | -2.68361200 | -0.27553500 | 0.00000100  |
| O | -1.70755700 | -1.00954900 | 0.00001100  |
| O | -3.15106000 | 0.80720600  | -0.00001300 |
| C | 0.00828300  | -0.32731600 | 0.00000400  |
| C | 0.96264000  | -1.31364000 | -0.00000300 |
| C | 2.29766500  | -0.89614000 | -0.00000600 |
| C | 2.60514000  | 0.46468800  | -0.00000300 |
| C | 1.59069400  | 1.42110400  | 0.00000400  |
| C | 0.24633200  | 1.02717300  | 0.00000700  |
| H | 0.69123700  | -2.36280900 | -0.00000500 |
| H | 3.09172100  | -1.63490700 | -0.00001200 |
| H | 3.64152100  | 0.78159100  | -0.00000600 |
| H | 1.83608300  | 2.47754000  | 0.00000600  |
| H | -0.55447900 | 1.75532700  | 0.00001200  |

### 11a-TS-20a

E= -860.3502216 a.u., im. freq.= 423.28i

0 2

|   |             |             |             |
|---|-------------|-------------|-------------|
| C | 1.35445700  | -0.61652500 | 0.10789100  |
| C | 1.52152400  | -1.77812900 | -0.66404900 |
| C | 2.69984200  | -2.51159200 | -0.59108000 |
| C | 3.72001500  | -2.11283400 | 0.27122400  |
| C | 3.55666000  | -0.97366700 | 1.05704900  |
| C | 2.38533900  | -0.22880400 | 0.97746300  |
| O | 2.16614000  | 2.65823500  | 0.06123800  |
| C | 1.37484400  | 2.51776000  | -0.83367600 |
| O | 1.01702200  | 2.75763200  | -1.94200000 |
| C | 0.01164200  | 1.49270800  | 0.02629700  |
| C | -1.08048900 | 2.47829500  | 0.31606000  |
| C | 0.09051700  | 0.15432900  | 0.01779600  |
| C | -1.18288400 | -0.61987800 | -0.15393500 |
| C | -1.52001800 | -1.63310300 | 0.75346200  |
| C | -2.71316500 | -2.33165000 | 0.60780700  |
| C | -3.57190400 | -2.04405800 | -0.45265400 |
| C | -3.23381500 | -1.05176200 | -1.36894400 |
| C | -2.04717600 | -0.33868500 | -1.21824200 |
| C | -2.06558100 | 2.03714300  | 1.30464500  |
| N | -2.83553700 | 1.71816600  | 2.10006400  |
| H | 0.72943300  | -2.09489400 | -1.33141900 |
| H | 2.82087300  | -3.39637500 | -1.20545600 |
| H | 4.63526400  | -2.69041200 | 0.33454900  |
| H | 4.34213600  | -0.66447200 | 1.73691700  |
| H | 2.26260800  | 0.65499600  | 1.58792700  |
| H | -1.59089900 | 2.76536200  | -0.61043800 |
| H | -0.62366100 | 3.39980600  | 0.69660500  |

|   |             |             |             |
|---|-------------|-------------|-------------|
| H | -0.85426800 | -1.85831700 | 1.57781900  |
| H | -2.97408000 | -3.10191400 | 1.32441000  |
| H | -4.49912600 | -2.59417000 | -0.56437600 |
| H | -3.89118000 | -0.83233200 | -2.20238500 |
| H | -1.77248600 | 0.42133700  | -1.94119300 |

## 8b

E= -827.454306 a.u., number of negative frequencies = 0

0 1

|   |             |             |             |
|---|-------------|-------------|-------------|
| C | -2.27233400 | -0.27113100 | -0.05022400 |
| C | -1.08566900 | -0.49620300 | -0.08738600 |
| C | 0.30373100  | -0.85694200 | -0.16114100 |
| O | 1.08018000  | 0.23839900  | 0.09515300  |
| O | 0.71526100  | -1.95944400 | -0.40994100 |
| C | -3.66879700 | -0.00626800 | -0.00158100 |
| C | -4.13977400 | 1.28399700  | 0.29965400  |
| C | -5.50524800 | 1.53427900  | 0.34695400  |
| C | -6.41555600 | 0.50804800  | 0.09550500  |
| C | -5.95710400 | -0.77442800 | -0.20460900 |
| C | -4.59369400 | -1.03513600 | -0.25383300 |
| C | 2.47481300  | 0.17253100  | 0.06103300  |
| C | 3.10878500  | 1.29390900  | -0.46629800 |
| C | 4.49779200  | 1.36399500  | -0.47925300 |
| C | 5.22248200  | 0.30135400  | 0.03864600  |
| C | 4.60237500  | -0.81908500 | 0.56906800  |
| C | 3.21149300  | -0.88772000 | 0.58474000  |
| H | -3.42646100 | 2.07552400  | 0.49391000  |
| H | -5.86113900 | 2.53108100  | 0.58015600  |
| H | -7.48038000 | 0.70745800  | 0.13321900  |
| H | -6.66406300 | -1.57228800 | -0.40021500 |
| H | -4.22937100 | -2.02837600 | -0.48562400 |



|   |            |             |             |
|---|------------|-------------|-------------|
| H | 2.50528900 | 2.10294500  | -0.85778000 |
| H | 5.01705200 | 2.22355800  | -0.88338400 |
| H | 5.20530600 | -1.62668900 | 0.96442800  |
| H | 2.71432100 | -1.75829300 | 0.98430300  |
| F | 6.57290400 | 0.36069300  | 0.02684900  |

## 9b

E= -959.6231437 a.u., number of negative frequencies = 0

0 2

|   |             |             |             |
|---|-------------|-------------|-------------|
| C | 1.05460600  | 1.00706900  | -0.54304500 |
| C | -0.05554300 | 0.03329900  | -0.25004600 |
| O | 0.08264500  | -1.07601700 | 0.18194100  |
| O | -1.25663100 | 0.60956700  | -0.55991700 |
| C | 0.69473300  | 2.41225400  | -1.03712700 |
| C | 2.29443800  | 0.62727600  | -0.36650200 |
| C | -2.46694600 | -0.02958800 | -0.26739800 |
| C | -2.72834500 | -1.34595800 | -0.63453300 |
| C | -3.98466200 | -1.88483600 | -0.36946600 |
| C | -4.94272600 | -1.09573400 | 0.24868500  |
| C | -4.68969900 | 0.21790800  | 0.61395900  |
| C | -3.43323400 | 0.75547700  | 0.35249200  |
| C | 3.42190800  | -0.10342700 | -0.07202900 |
| C | 4.09392400  | -0.85851300 | -1.08037800 |
| C | 5.24339200  | -1.56132000 | -0.77430600 |
| C | 5.77063100  | -1.53908300 | 0.52228300  |
| C | 5.12684100  | -0.80086500 | 1.52241600  |
| C | 3.97569200  | -0.08944400 | 1.24420000  |
| C | 0.02664200  | 3.22030000  | -0.01625400 |
| N | -0.49545400 | 3.85349000  | 0.79295500  |
| H | 1.60609600  | 2.92677000  | -1.34710200 |
| H | 0.03358900  | 2.34609800  | -1.90513400 |

|   |             |             |             |
|---|-------------|-------------|-------------|
| H | -1.96374600 | -1.94661500 | -1.10487400 |
| H | -4.22420000 | -2.90623000 | -0.63648000 |
| H | -5.46407800 | 0.80105300  | 1.09565700  |
| H | -3.19233200 | 1.77560200  | 0.62432900  |
| H | 3.68416500  | -0.87758800 | -2.08254500 |
| H | 5.73816500  | -2.13708500 | -1.54822500 |
| H | 6.67303300  | -2.09306700 | 0.75139600  |
| H | 5.53093800  | -0.78766400 | 2.52822800  |
| H | 3.47427800  | 0.47837400  | 2.01775300  |
| F | -6.16063900 | -1.62348600 | 0.50249000  |

### 10b

E= -959.6391352 a.u., number of negative frequencies = 0

0 2

|   |             |             |             |
|---|-------------|-------------|-------------|
| C | 3.12131700  | -0.54594900 | -0.93152200 |
| C | 1.80866400  | -0.83232400 | -1.16039400 |
| C | 0.80979900  | -0.97605400 | -0.04469100 |
| C | 1.39281700  | -0.70337100 | 1.31285500  |
| C | 2.70836200  | -0.40447700 | 1.49415700  |
| C | 3.56809000  | -0.32286000 | 0.38297500  |
| C | -0.50280200 | -0.19709300 | -0.27113500 |
| C | -1.49843800 | -1.08175200 | -0.44405900 |
| C | -0.96697800 | -2.46024400 | -0.34005200 |
| O | 0.36684100  | -2.38727300 | -0.07227800 |
| O | -1.55997900 | -3.49540300 | -0.47149900 |
| C | -2.95815300 | -0.88175000 | -0.75710500 |
| C | -0.58196500 | 1.27325300  | -0.22603000 |
| C | -1.64879900 | 1.89680500  | 0.44436700  |
| C | -1.74178400 | 3.28369100  | 0.49650800  |
| C | -0.77672600 | 4.07533000  | -0.12147600 |
| C | 0.29011200  | 3.47022300  | -0.78273600 |

|   |             |             |             |
|---|-------------|-------------|-------------|
| C | 0.39342400  | 2.08438000  | -0.82846600 |
| C | -3.79852800 | -0.83751900 | 0.44160500  |
| N | -4.44500100 | -0.77481600 | 1.39371800  |
| H | 3.83644800  | -0.49030500 | -1.74376200 |
| H | 1.44545800  | -1.03168300 | -2.16143800 |
| H | 0.71715500  | -0.78620300 | 2.15524300  |
| H | 3.11549400  | -0.23148400 | 2.48319200  |
| H | -3.11258400 | 0.04323300  | -1.31921900 |
| H | -3.29461800 | -1.72124400 | -1.37318400 |
| H | -2.38871500 | 1.29762600  | 0.96017500  |
| H | -2.56710100 | 3.74354900  | 1.02760500  |
| H | -0.85129200 | 5.15599000  | -0.08233800 |
| H | 1.04742800  | 4.07901200  | -1.26319800 |
| H | 1.22665700  | 1.62871600  | -1.34655300 |
| F | 4.86392400  | -0.02709000 | 0.58542900  |

### 11b

E= -959.628267 a.u., number of negative frequencies = 0

0 2

|   |             |             |             |
|---|-------------|-------------|-------------|
| C | 1.09664100  | -0.13146700 | -0.05522600 |
| C | 1.64488200  | -1.03182100 | -0.98581300 |
| C | 2.96236900  | -1.44368300 | -0.88065000 |
| C | 3.72826200  | -0.98048900 | 0.18866800  |
| C | 3.21710500  | -0.12448900 | 1.14751700  |
| C | 1.89971200  | 0.30377100  | 1.01932400  |
| O | 1.61475700  | 2.37472100  | -0.45524300 |
| C | 0.35670200  | 2.64526700  | -0.49450800 |
| O | 0.04902500  | 3.80108100  | -0.80260800 |
| C | -0.66813800 | 1.59414800  | -0.23011200 |
| C | -2.08192600 | 2.15024400  | -0.14288400 |
| C | -0.32768500 | 0.28522400  | -0.16056800 |

|   |             |             |             |
|---|-------------|-------------|-------------|
| C | -1.32402100 | -0.82043300 | -0.17945300 |
| C | -1.28870100 | -1.81754900 | 0.80591700  |
| C | -2.21392400 | -2.85498000 | 0.79507000  |
| C | -3.16984500 | -2.93076200 | -0.21623600 |
| C | -3.19682700 | -1.96196200 | -1.21685900 |
| C | -2.28471300 | -0.91132800 | -1.19612800 |
| C | -2.81707300 | 1.70566200  | 1.03937200  |
| N | -3.39409100 | 1.37589100  | 1.98082300  |
| H | 1.03277600  | -1.39448900 | -1.80244900 |
| H | 3.40886100  | -2.11714300 | -1.60126500 |
| H | 3.84121400  | 0.19808200  | 1.97069600  |
| H | 1.47415900  | 0.95367200  | 1.77246500  |
| H | -2.67187600 | 1.91858700  | -1.03350200 |
| H | -2.00231000 | 3.24150100  | -0.11710100 |
| H | -0.54632500 | -1.76508200 | 1.59353300  |
| H | -2.18852400 | -3.60575500 | 1.57626500  |
| H | -3.88716600 | -3.74319200 | -0.22686100 |
| H | -3.92723500 | -2.02397100 | -2.01532400 |
| H | -2.29823300 | -0.17235700 | -1.98878600 |
| F | 5.00179100  | -1.39773700 | 0.29386700  |

## 12b

E= -959.6432717 a.u., number of negative frequencies = 0

0 2

|   |             |             |             |
|---|-------------|-------------|-------------|
| C | -1.03035700 | -0.38711200 | -0.12818300 |
| C | -2.08625400 | 0.58103500  | -0.59342100 |
| C | -3.48012400 | 0.24523800  | -0.18004900 |
| C | -3.74764000 | -0.97592600 | 0.32408800  |
| C | -2.74385000 | -1.94957200 | 0.58550000  |
| C | -1.40659900 | -1.62927000 | 0.37160000  |
| O | -1.80770300 | 1.94332600  | -0.18265800 |

|   |             |             |             |
|---|-------------|-------------|-------------|
| C | -0.53476800 | 2.40131400  | -0.32716400 |
| O | -0.32454300 | 3.58797800  | -0.28240000 |
| C | 0.55226200  | 1.40221400  | -0.46624500 |
| C | 1.92024600  | 2.00418400  | -0.72149600 |
| C | 0.32766900  | 0.06283900  | -0.26621500 |
| C | 1.44392000  | -0.92433000 | -0.17402600 |
| C | 1.56674000  | -1.93742500 | -1.13500900 |
| C | 2.60854500  | -2.85758800 | -1.06260300 |
| C | 3.53213700  | -2.78741400 | -0.02095300 |
| C | 3.41160200  | -1.79081600 | 0.94441500  |
| C | 2.37687500  | -0.86120000 | 0.86840700  |
| C | 2.58080300  | 2.47492600  | 0.49885100  |
| N | 3.10746500  | 2.81297200  | 1.46668600  |
| H | -2.05002500 | 0.59406500  | -1.69956000 |
| H | -4.25895400 | 0.97709200  | -0.34733900 |
| H | -3.03911000 | -2.90423200 | 1.00067300  |
| H | -0.64104300 | -2.34504800 | 0.64381300  |
| H | 2.57460300  | 1.27309700  | -1.20120900 |
| H | 1.80946400  | 2.86236400  | -1.38895000 |
| H | 0.84923400  | -1.99573500 | -1.94603300 |
| H | 2.69846700  | -3.62871900 | -1.81921400 |
| H | 4.34141900  | -3.50620400 | 0.03711300  |
| H | 4.12428700  | -1.73123800 | 1.75874500  |
| H | 2.29208900  | -0.08828900 | 1.62271800  |
| F | -5.01577400 | -1.31944200 | 0.63199100  |

### 13b

E= -959.1037020 a.u., number of negative frequencies = 0

0 1

|   |            |             |             |
|---|------------|-------------|-------------|
| C | 1.06349000 | -0.31857300 | -0.03080300 |
| C | 2.07194100 | 0.65977100  | -0.09597100 |

|   |             |             |             |
|---|-------------|-------------|-------------|
| C | 3.41746500  | 0.34312800  | 0.07374300  |
| C | 3.74405600  | -0.97642400 | 0.31935500  |
| C | 2.78421700  | -1.98288700 | 0.40693900  |
| C | 1.45362700  | -1.64521500 | 0.23406300  |
| O | 1.78075600  | 1.96711800  | -0.32472400 |
| C | 0.48018000  | 2.42618400  | -0.48312700 |
| O | 0.31999500  | 3.60071900  | -0.68164000 |
| C | -0.58687100 | 1.42337300  | -0.41801100 |
| C | -1.98197500 | 1.98121700  | -0.62936700 |
| C | -0.31612300 | 0.10514500  | -0.21002000 |
| C | -1.40405100 | -0.91656200 | -0.16108900 |
| C | -2.27512200 | -0.97816000 | 0.93259500  |
| C | -3.28625700 | -1.93589200 | 0.97142100  |
| C | -3.44140500 | -2.83558200 | -0.08027600 |
| C | -2.57892600 | -2.77846600 | -1.17363100 |
| C | -1.56125200 | -1.82901700 | -1.21250000 |
| C | -2.59650300 | 2.43893300  | 0.61901300  |
| N | -3.07707700 | 2.77179800  | 1.61232600  |
| H | 4.17502700  | 1.11282100  | 0.01822500  |
| H | 3.09324700  | -2.99931300 | 0.61217200  |
| H | 0.69386700  | -2.41162400 | 0.30869800  |
| H | -1.92302700 | 2.83446700  | -1.30894400 |
| H | -2.63356600 | 1.22633600  | -1.07419900 |
| H | -2.16379000 | -0.27657000 | 1.75080900  |
| H | -3.95434200 | -1.97324900 | 1.82397000  |
| H | -4.23162900 | -3.57684000 | -0.04988700 |
| H | -2.69726000 | -3.47281500 | -1.99762300 |
| H | -0.89153200 | -1.78676300 | -2.06436000 |
| F | 5.03862100  | -1.30083900 | 0.48575100  |

14b

E= -959.6072045 a.u., number of negative frequencies = 0

0 2

|   |             |             |             |
|---|-------------|-------------|-------------|
| C | 2.93233800  | 2.01252000  | 1.07202700  |
| C | 2.16418700  | 0.73743500  | 0.68479900  |
| C | 0.86375200  | 0.73111500  | 0.87317600  |
| C | -0.40078700 | 0.05413500  | 0.89028800  |
| O | -1.32825300 | 0.77151000  | 0.19963500  |
| O | -0.60712900 | -0.98958700 | 1.47097300  |
| C | 2.93048600  | -0.41581700 | 0.13150900  |
| C | 2.48309500  | -1.72917700 | 0.34638100  |
| C | 3.19703500  | -2.80752800 | -0.16299900 |
| C | 4.36528100  | -2.59762100 | -0.89401000 |
| C | 4.81868000  | -1.29884600 | -1.10904500 |
| C | 4.11195200  | -0.21414100 | -0.59758800 |
| C | 3.21461300  | 2.89091500  | -0.06302200 |
| N | 3.43833600  | 3.58536700  | -0.95532900 |
| C | -2.65070200 | 0.35357200  | 0.03676600  |
| C | -3.24836700 | 0.77747100  | -1.14805000 |
| C | -4.58380600 | 0.48255500  | -1.39542300 |
| C | -5.29470600 | -0.23390900 | -0.44387600 |
| C | -4.71170100 | -0.65760800 | 0.73982000  |
| C | -3.37347100 | -0.36213200 | 0.98984400  |
| H | 2.34864900  | 2.57793400  | 1.80094000  |
| H | 3.87930900  | 1.73954200  | 1.54710500  |
| H | 1.58681800  | -1.90153100 | 0.92948700  |
| H | 2.84226400  | -3.81567600 | 0.01813300  |
| H | 4.91989600  | -3.44058900 | -1.29000600 |
| H | 5.72429400  | -1.12471900 | -1.67868900 |
| H | 4.47466600  | 0.78716400  | -0.79395900 |
| H | -2.65852900 | 1.33897400  | -1.86127500 |
| H | -5.07276600 | 0.79875600  | -2.30789900 |

|   |             |             |             |
|---|-------------|-------------|-------------|
| H | -5.30190800 | -1.21418400 | 1.45669100  |
| H | -2.90393500 | -0.69642000 | 1.90155400  |
| F | -6.59236900 | -0.52664900 | -0.67813700 |

### 15b

E= -959.6447169 a.u., number of negative frequencies = 0

0 2

|   |             |             |             |
|---|-------------|-------------|-------------|
| C | -1.15910000 | -0.14586000 | -0.16022700 |
| C | -2.09462400 | 0.95926300  | -0.58189200 |
| C | -3.51597500 | 0.77496300  | -0.15384900 |
| C | -3.96480200 | -0.41910800 | 0.29198000  |
| C | -3.04620600 | -1.49371000 | 0.45934200  |
| C | -1.68102000 | -1.35978700 | 0.27426200  |
| O | -1.65781200 | 2.26112300  | -0.12587800 |
| C | -0.33794000 | 2.57144400  | -0.26401300 |
| O | 0.00779000  | 3.72417000  | -0.18210900 |
| C | 0.62072400  | 1.45710600  | -0.44039000 |
| C | 2.05178500  | 1.89859900  | -0.67730500 |
| C | 0.23957000  | 0.14567100  | -0.28188500 |
| C | 1.23206300  | -0.96824400 | -0.22222300 |
| C | 1.23922900  | -1.95582800 | -1.21707500 |
| C | 2.16321500  | -2.99581300 | -1.17415400 |
| C | 3.08236700  | -3.07142000 | -0.12901000 |
| C | 3.07592200  | -2.10044000 | 0.86949400  |
| C | 2.15942000  | -1.05229100 | 0.82371600  |
| C | 2.76041700  | 2.24646400  | 0.55750600  |
| N | 3.32042700  | 2.48757800  | 1.53561100  |
| H | -2.07159100 | 1.00714600  | -1.68779700 |
| H | -4.17038200 | 1.63085100  | -0.26103600 |
| H | -5.00251900 | -0.57947300 | 0.55806400  |
| H | -1.03237700 | -2.19042800 | 0.52088800  |



|   |             |             |             |
|---|-------------|-------------|-------------|
| H | 2.61542700  | 1.11002700  | -1.18069400 |
| H | 2.04806300  | 2.78477900  | -1.31669900 |
| H | 0.52428900  | -1.90071400 | -2.03053900 |
| H | 2.16458200  | -3.74683000 | -1.95590900 |
| H | 3.79938300  | -3.88357700 | -0.09346000 |
| H | 3.78567000  | -2.15381100 | 1.68682300  |
| H | 2.16217400  | -0.30017300 | 1.60328500  |
| F | -3.53508900 | -2.66880500 | 0.89178000  |

### 17b

E= -519.5104027 a.u., number of negative frequencies = 0

0 2

|   |             |             |             |
|---|-------------|-------------|-------------|
| O | 1.91399800  | 0.54647300  | 0.22048800  |
| C | 0.54600500  | 0.25975200  | 0.11028600  |
| C | -0.29375800 | 1.36293800  | 0.02139900  |
| C | -1.66981900 | 1.17089400  | -0.05048200 |
| C | -2.16733200 | -0.12383600 | -0.03582400 |
| C | -1.33452200 | -1.22874400 | 0.05469000  |
| C | 0.04227400  | -1.03570000 | 0.13589300  |
| C | 2.81073700  | -0.36207300 | -0.20397400 |
| O | 3.98382500  | -0.25824000 | -0.14357100 |
| H | 0.13521100  | 2.35659100  | 0.00848600  |
| H | -2.35263700 | 2.00778000  | -0.12092900 |
| H | -1.76273900 | -2.22278500 | 0.06903900  |
| H | 0.71176800  | -1.88216900 | 0.21570700  |
| F | -3.50174400 | -0.31385100 | -0.10884100 |

### 17b

E= -330.8820953 a.u., number of negative frequencies = 0

0 2

|   |             |             |            |
|---|-------------|-------------|------------|
| C | -1.20497500 | -1.22285400 | 0.00000000 |
|---|-------------|-------------|------------|

|   |             |             |            |
|---|-------------|-------------|------------|
| C | 0.19588900  | -1.21947900 | 0.00000000 |
| C | 0.86031100  | 0.00000000  | 0.00000000 |
| C | 0.19588900  | 1.21947900  | 0.00000000 |
| C | -1.20497500 | 1.22285400  | 0.00000000 |
| C | -1.83323500 | 0.00000000  | 0.00000000 |
| H | -1.75335400 | -2.15776300 | 0.00000000 |
| H | 0.76698500  | -2.14016000 | 0.00000000 |
| H | 0.76698500  | 2.14016000  | 0.00000000 |
| H | -1.75335400 | 2.15776300  | 0.00000000 |
| F | 2.21325700  | 0.00000000  | 0.00000000 |

## 20b

E= -770.9997428 a.u., number of negative frequencies = 0

0 2

|   |             |             |             |
|---|-------------|-------------|-------------|
| C | -1.27830400 | -0.75475800 | -0.07002400 |
| C | -1.30599000 | -1.42527200 | 1.16040400  |
| C | -2.18731500 | -2.48140400 | 1.36811000  |
| C | -3.04890100 | -2.88894600 | 0.34969600  |
| C | -3.02322900 | -2.23442700 | -0.87874000 |
| C | -2.14391000 | -1.17267800 | -1.08709700 |
| C | -0.85223500 | 1.60370000  | -0.54353100 |
| C | -2.16676000 | 2.26195000  | -0.70995000 |
| C | -0.34924400 | 0.40979800  | -0.27528800 |
| C | 1.11875800  | 0.19064300  | -0.15582000 |
| C | 1.68215100  | -1.06814600 | -0.40593600 |
| C | 3.05750400  | -1.26760800 | -0.32936700 |
| C | 3.86926100  | -0.19579800 | 0.00502000  |
| C | 3.34888600  | 1.06411600  | 0.26725400  |
| C | 1.97510000  | 1.24893400  | 0.18721600  |
| C | -2.34515700 | 3.40895300  | 0.18861600  |
| N | -2.48686600 | 4.30985400  | 0.89227000  |

|   |             |             |             |
|---|-------------|-------------|-------------|
| H | -0.63915600 | -1.11005000 | 1.95479500  |
| H | -2.20384800 | -2.98613600 | 2.32752800  |
| H | -3.73300700 | -3.71368700 | 0.51342100  |
| H | -3.68311800 | -2.55131900 | -1.67852500 |
| H | -2.11238500 | -0.67562000 | -2.05045300 |
| H | -2.29672700 | 2.61616300  | -1.73989100 |
| H | -2.97914400 | 1.54430300  | -0.51984800 |
| H | 1.04170700  | -1.90025100 | -0.67079500 |
| H | 3.50210100  | -2.23525600 | -0.52573100 |
| H | 4.01608200  | 1.87288200  | 0.53816200  |
| H | 1.55134800  | 2.22274700  | 0.40269600  |
| F | 5.20450200  | -0.38300900 | 0.08659700  |

### 8b-TS-9b

E= -959.5751436 a.u., im. freq.= 420.97i

0 2

|   |             |             |             |
|---|-------------|-------------|-------------|
| C | -0.84313300 | 0.79662800  | 0.24765400  |
| C | 0.59625900  | 1.01790400  | 0.11924500  |
| O | 1.14932700  | 2.07427400  | -0.03876200 |
| O | 1.23726700  | -0.18344200 | 0.21379700  |
| C | -1.60905400 | 2.92186000  | 0.64820200  |
| C | -1.77463900 | -0.00920400 | 0.16904300  |
| C | 2.62801100  | -0.26864100 | 0.07634600  |
| C | 3.09058800  | -1.31340600 | -0.71654600 |
| C | 4.45898400  | -1.52895300 | -0.84634000 |
| C | 5.33228900  | -0.68586000 | -0.17631900 |
| C | 4.88116000  | 0.35725100  | 0.61818800  |
| C | 3.51162600  | 0.56979900  | 0.75026300  |
| C | -2.96916800 | -0.75557300 | 0.10360500  |
| C | -3.19885000 | -1.80602100 | 1.01734600  |
| C | -4.37238900 | -2.54205100 | 0.94880900  |

|   |             |             |             |
|---|-------------|-------------|-------------|
| C | -5.32748200 | -2.25150600 | -0.02690600 |
| C | -5.10820600 | -1.21502100 | -0.93501300 |
| C | -3.94152100 | -0.46597000 | -0.87743000 |
| C | -2.72290500 | 3.07718500  | -0.18509700 |
| N | -3.64084900 | 3.15171300  | -0.89433600 |
| H | -1.78602800 | 2.79473300  | 1.70823900  |
| H | -0.66757600 | 3.35426800  | 0.33729700  |
| H | 2.37475700  | -1.95054100 | -1.22015200 |
| H | 4.84938800  | -2.33370200 | -1.45598900 |
| H | 5.59741900  | 0.99177500  | 1.12442200  |
| H | 3.14341900  | 1.38344300  | 1.35736900  |
| H | -2.44952000 | -2.02949000 | 1.76676500  |
| H | -4.54408500 | -3.34642400 | 1.65454600  |
| H | -6.24247700 | -2.83040000 | -0.07721100 |
| H | -5.85413700 | -0.98368800 | -1.68619300 |
| H | -3.77836100 | 0.35695300  | -1.56129200 |
| F | 6.66233000  | -0.88734600 | -0.29978200 |

### 9b-TS-10b

E= -959.6086324 a.u., im. freq.= 432.92i

0 2

|   |             |             |             |
|---|-------------|-------------|-------------|
| C | 2.41562300  | -1.70872200 | -0.85491200 |
| C | 1.07823100  | -1.97214100 | -1.07097600 |
| C | 0.14727100  | -1.83337900 | -0.00222700 |
| C | 0.64396400  | -1.69027000 | 1.32573400  |
| C | 1.98239000  | -1.42556300 | 1.53233400  |
| C | 2.84734500  | -1.41159200 | 0.43800800  |
| C | -0.65758400 | 0.12380300  | -0.34425600 |
| C | -1.91750800 | -0.24101800 | -0.46102800 |
| C | -2.20898300 | -1.69748600 | -0.38100400 |
| O | -1.09276100 | -2.46243200 | -0.15761500 |

|   |             |             |             |
|---|-------------|-------------|-------------|
| O | -3.28453900 | -2.20845200 | -0.50813900 |
| C | -3.11389400 | 0.67983600  | -0.67148600 |
| C | 0.14855400  | 1.29955400  | -0.31296100 |
| C | 0.25292000  | 2.06234300  | 0.87115300  |
| C | 1.05940500  | 3.19164400  | 0.90718700  |
| C | 1.77905700  | 3.58290200  | -0.22241800 |
| C | 1.68680300  | 2.83525200  | -1.39701600 |
| C | 0.88913500  | 1.70020300  | -1.44612000 |
| C | -3.65370700 | 1.16828600  | 0.59727600  |
| N | -4.05309700 | 1.55548600  | 1.60679800  |
| H | 3.14101900  | -1.76074300 | -1.65709100 |
| H | 0.70810900  | -2.24979400 | -2.04973000 |
| H | -0.05312300 | -1.75084000 | 2.15180700  |
| H | 2.38104100  | -1.26207900 | 2.52563700  |
| H | -2.82584300 | 1.53897100  | -1.28142900 |
| H | -3.89935900 | 0.12790300  | -1.19409800 |
| H | -0.31368800 | 1.76611300  | 1.74552700  |
| H | 1.12310200  | 3.77333400  | 1.81965400  |
| H | 2.40634900  | 4.46594100  | -0.18819100 |
| H | 2.24180500  | 3.13821400  | -2.27757700 |
| H | 0.82206800  | 1.11827300  | -2.35737100 |
| F | 4.15383000  | -1.15650300 | 0.64417500  |

### 10b-TS-11b

E= -959.6266042 a.u., im. freq.= 315.13i

0 2

|   |            |             |             |
|---|------------|-------------|-------------|
| C | 3.27285900 | 0.16009700  | -0.96223600 |
| C | 1.93546600 | -0.09823900 | -1.15291600 |
| C | 1.05135000 | -0.29674300 | -0.03552400 |
| C | 1.58434400 | -0.06227400 | 1.27759500  |
| C | 2.92265400 | 0.18984500  | 1.46433400  |

|   |             |             |             |
|---|-------------|-------------|-------------|
| C | 3.75210400  | 0.28874500  | 0.34364400  |
| C | -0.44103000 | -0.17501300 | -0.23580700 |
| C | -1.07942000 | -1.34018300 | -0.43709200 |
| C | -0.19430300 | -2.54343300 | -0.37064200 |
| O | 1.05584600  | -2.24793500 | -0.08753600 |
| O | -0.58135900 | -3.68030000 | -0.56222900 |
| C | -2.53343800 | -1.58173600 | -0.76042800 |
| C | -1.04257800 | 1.17790600  | -0.17389900 |
| C | -2.26419700 | 1.39391500  | 0.48538700  |
| C | -2.82722000 | 2.66542200  | 0.53941600  |
| C | -2.18548300 | 3.74503500  | -0.06235200 |
| C | -0.96592600 | 3.54800400  | -0.70728800 |
| C | -0.39475800 | 2.28134600  | -0.75385800 |
| C | -3.34794200 | -1.84790200 | 0.42666200  |
| N | -3.98561500 | -2.02313200 | 1.37080300  |
| H | 3.95927600  | 0.26592400  | -1.79266900 |
| H | 1.53648900  | -0.21336200 | -2.15304400 |
| H | 0.91524500  | -0.13039500 | 2.12592800  |
| H | 3.34691400  | 0.32526600  | 2.45111900  |
| H | -2.96722000 | -0.73089200 | -1.29233400 |
| H | -2.58675700 | -2.46492000 | -1.40454300 |
| H | -2.76003700 | 0.57535700  | 0.99123300  |
| H | -3.76580600 | 2.81046900  | 1.06169600  |
| H | -2.62664700 | 4.73421500  | -0.02087000 |
| H | -0.45541200 | 4.38357300  | -1.17233700 |
| H | 0.55622600  | 2.14729500  | -1.25490200 |
| F | 5.05513900  | 0.53961500  | 0.52813800  |

### 11b-TS-12b

E= -959.6235041 a.u., im. freq.= 337.46i

0 2

|   |             |             |             |
|---|-------------|-------------|-------------|
| C | -1.04640900 | -0.35964000 | -0.10759500 |
| C | -2.05327300 | 0.30565800  | -0.88453200 |
| C | -3.42525900 | 0.00355800  | -0.66597000 |
| C | -3.74874200 | -0.88131100 | 0.32583700  |
| C | -2.77737700 | -1.54604700 | 1.09554300  |
| C | -1.43312900 | -1.28567000 | 0.86362200  |
| O | -1.74018200 | 2.10073900  | -0.21001400 |
| C | -0.47373800 | 2.44410300  | -0.25633100 |
| O | -0.15646400 | 3.61355000  | -0.11180100 |
| C | 0.59238700  | 1.39876000  | -0.44884000 |
| C | 1.96234100  | 1.98233500  | -0.74631600 |
| C | 0.34978800  | 0.07335400  | -0.27237300 |
| C | 1.40613700  | -0.97367800 | -0.20217400 |
| C | 1.30456700  | -2.11400400 | -1.01498800 |
| C | 2.27697000  | -3.10692800 | -0.96890700 |
| C | 3.35554000  | -2.98932300 | -0.09330100 |
| C | 3.45620800  | -1.87269600 | 0.73277600  |
| C | 2.49149300  | -0.86945500 | 0.67917800  |
| C | 2.67348700  | 2.45091900  | 0.44483200  |
| N | 3.25105600  | 2.77799500  | 1.38713200  |
| H | -1.77594200 | 0.67359000  | -1.86366300 |
| H | -4.19778200 | 0.46098600  | -1.26915100 |
| H | -3.09862500 | -2.23791100 | 1.86371600  |
| H | -0.67857900 | -1.77812300 | 1.46400400  |
| H | 2.59166700  | 1.24374300  | -1.24802100 |
| H | 1.83655100  | 2.84154500  | -1.41078100 |
| H | 0.46519700  | -2.21338500 | -1.69407500 |
| H | 2.19160900  | -3.97383500 | -1.61411100 |
| H | 4.11012700  | -3.76644800 | -0.05268600 |
| H | 4.28535900  | -1.77861100 | 1.42436800  |
| H | 2.57444000  | -0.01383900 | 1.33769300  |

F -5.03935400 -1.17528900 0.56050300

### 12b-TS-13b

E= -959.5967464 a.u., im. freq.= 945.18i

0 2

|   |             |             |             |
|---|-------------|-------------|-------------|
| C | -1.04280800 | -0.33609200 | -0.04639600 |
| C | -2.07179200 | 0.63698300  | -0.20704100 |
| C | -3.41855800 | 0.32565300  | 0.08300300  |
| C | -3.73193300 | -0.98563000 | 0.34939900  |
| C | -2.76369300 | -1.99137000 | 0.41990200  |
| C | -1.43327500 | -1.65556100 | 0.23310000  |
| O | -1.77578900 | 1.96897700  | -0.27080000 |
| C | -0.47793800 | 2.42336800  | -0.44371800 |
| O | -0.31062000 | 3.60436500  | -0.59027000 |
| C | 0.59034100  | 1.41752500  | -0.42072200 |
| C | 1.98072100  | 1.98269000  | -0.64221300 |
| C | 0.33010400  | 0.09548300  | -0.21061400 |
| C | 1.42489800  | -0.91829700 | -0.15373500 |
| C | 1.57810700  | -1.84633900 | -1.19222400 |
| C | 2.60286600  | -2.78780600 | -1.14861300 |
| C | 3.47641000  | -2.82160100 | -0.06296500 |
| C | 3.32528000  | -1.90663100 | 0.97605100  |
| C | 2.30724600  | -0.95648400 | 0.93201000  |
| C | 2.60303300  | 2.44529900  | 0.60060800  |
| N | 3.09076400  | 2.78072600  | 1.58953800  |
| H | -2.19940800 | 0.35850500  | -1.96934600 |
| H | -4.17277900 | 1.09947800  | 0.04990100  |
| H | -3.06773700 | -3.00558000 | 0.64312500  |
| H | -0.67281900 | -2.41925200 | 0.32644600  |
| H | 2.63253000  | 1.23066500  | -1.09144900 |
| H | 1.91239300  | 2.83512600  | -1.32192300 |



|   |             |             |             |
|---|-------------|-------------|-------------|
| H | 0.89994100  | -1.82152300 | -2.03813300 |
| H | 2.71837900  | -3.49395200 | -1.96291500 |
| H | 4.27211200  | -3.55682000 | -0.02878200 |
| H | 4.00168000  | -1.92622400 | 1.82260400  |
| H | 2.19896300  | -0.24316800 | 1.74040100  |
| F | -5.01570900 | -1.31513500 | 0.57743000  |

### 8b-TS-14b

E= -959.5671715 a.u., im. freq.= 573.55i

0 2

|   |             |             |             |
|---|-------------|-------------|-------------|
| C | -2.07943100 | 1.41534200  | -1.68446800 |
| C | -1.93566200 | -0.26702900 | -0.30630400 |
| C | -0.72726700 | -0.54625100 | -0.26903800 |
| C | 0.65008800  | -0.43577300 | -0.67111500 |
| O | 1.46689500  | -0.48460500 | 0.41244400  |
| O | 1.00407300  | -0.31609300 | -1.81937400 |
| C | -3.30217000 | -0.48031500 | 0.12045800  |
| C | -4.13481900 | -1.35182700 | -0.59755100 |
| C | -5.44248900 | -1.56735700 | -0.17749200 |
| C | -5.93485000 | -0.90902700 | 0.94864600  |
| C | -5.11357000 | -0.03509500 | 1.65822100  |
| C | -3.80164100 | 0.18245600  | 1.25057900  |
| C | -2.27598000 | 2.53134600  | -0.85501000 |
| N | -2.43859200 | 3.42073700  | -0.12543500 |
| C | 2.85403900  | -0.33805100 | 0.30485100  |
| C | 3.45422600  | 0.36565000  | 1.34468600  |
| C | 4.83694700  | 0.50950300  | 1.37467600  |
| C | 5.58760100  | -0.05903800 | 0.35649900  |
| C | 4.99978600  | -0.76537200 | -0.68137500 |
| C | 3.61506700  | -0.91139300 | -0.71094300 |
| H | -1.12355100 | 1.32203900  | -2.18520900 |

|   |             |             |             |
|---|-------------|-------------|-------------|
| H | -2.94260900 | 1.04932400  | -2.22699900 |
| H | -3.74731800 | -1.86302600 | -1.47087200 |
| H | -6.07771500 | -2.25002800 | -0.72997500 |
| H | -6.95602600 | -1.07635300 | 1.27111600  |
| H | -5.49379600 | 0.48048300  | 2.53227500  |
| H | -3.16258400 | 0.86553200  | 1.79545000  |
| H | 2.83125400  | 0.79054900  | 2.12135700  |
| H | 5.33169400  | 1.05244700  | 2.16971000  |
| H | 5.62261600  | -1.19437400 | -1.45594800 |
| H | 3.14175000  | -1.44938000 | -1.51795500 |
| F | 6.93104900  | 0.07850900  | 0.37762500  |

### 9b-TS-15b

E= -959.6008279 a.u., im. freq.= 402.92i

0 2

|   |             |             |             |
|---|-------------|-------------|-------------|
| C | 1.27401400  | -0.60974200 | -1.04788900 |
| C | 1.53265000  | -1.74596100 | -0.24036500 |
| C | 2.63875900  | -1.82150400 | 0.58325500  |
| C | 3.56261800  | -0.77229700 | 0.59465200  |
| C | 3.33626100  | 0.32974500  | -0.23024700 |
| C | 2.24524500  | 0.42464700  | -1.06616200 |
| O | 0.62624400  | -2.78563500 | -0.24357200 |
| C | -0.70388100 | -2.57863200 | 0.05129500  |
| O | -1.43009400 | -3.53174100 | 0.09432500  |
| C | -1.17000700 | -1.19132200 | 0.35213900  |
| C | -2.54473800 | -1.14914400 | 1.03253900  |
| C | -0.50742200 | -0.08859400 | 0.03068000  |
| C | -0.76827100 | 1.32104900  | 0.10013400  |
| C | -1.80889500 | 1.89523200  | -0.66092600 |
| C | -2.03078300 | 3.26632600  | -0.62060800 |
| C | -1.22690300 | 4.08853700  | 0.16875300  |

|   |             |             |             |
|---|-------------|-------------|-------------|
| C | -0.19049800 | 3.53203900  | 0.91951900  |
| C | 0.04901600  | 2.16478000  | 0.87990800  |
| C | -3.63747400 | -1.14459600 | 0.06083200  |
| N | -4.48461000 | -1.10520500 | -0.71998800 |
| H | 0.61863700  | -0.72089500 | -1.90389400 |
| H | 2.77421000  | -2.69526000 | 1.20785700  |
| H | 4.44425200  | -0.79938400 | 1.22137500  |
| H | 2.13953800  | 1.27869800  | -1.72145400 |
| H | -2.66302700 | -2.01951500 | 1.68107500  |
| H | -2.62245500 | -0.24641700 | 1.64236200  |
| H | -2.43928600 | 1.25947600  | -1.27123300 |
| H | -2.83806900 | 3.69329100  | -1.20449500 |
| H | -1.40542800 | 5.15713000  | 0.19769600  |
| H | 0.43661400  | 4.16790900  | 1.53390300  |
| H | 0.85823200  | 1.73567100  | 1.45820400  |
| F | 4.24685500  | 1.32681800  | -0.22806300 |

### 9b-TS-17b

E= -959.5636712 a.u., im. freq.= 335.75i

0 2

|   |             |             |             |
|---|-------------|-------------|-------------|
| C | 1.51167400  | 1.53863500  | -0.58623300 |
| C | -0.14644100 | -0.11082400 | -0.92074300 |
| O | 0.07591200  | -1.27237300 | -0.85759000 |
| O | -1.29687700 | 0.56087900  | -0.79066900 |
| C | 0.73481000  | 2.76761700  | -0.85259800 |
| C | 2.51247200  | 0.90544600  | -0.27917800 |
| C | -2.50664100 | -0.07005500 | -0.39826200 |
| C | -3.32055800 | 0.68495400  | 0.43766000  |
| C | -4.55166600 | 0.17046000  | 0.83144600  |
| C | -4.92837000 | -1.08517600 | 0.37727000  |
| C | -4.11741200 | -1.84064200 | -0.45534500 |

|   |             |             |             |
|---|-------------|-------------|-------------|
| C | -2.88508800 | -1.32664700 | -0.85486700 |
| C | 3.56056700  | 0.01330300  | 0.04571700  |
| C | 4.39690300  | -0.50758300 | -0.96215900 |
| C | 5.42895300  | -1.37599300 | -0.63490300 |
| C | 5.64788900  | -1.74066600 | 0.69391500  |
| C | 4.82526400  | -1.23141700 | 1.69927500  |
| C | 3.79051900  | -0.36141600 | 1.38496400  |
| C | -0.12298100 | 3.16423600  | 0.26927000  |
| N | -0.80427200 | 3.48831300  | 1.13956700  |
| H | 1.42401600  | 3.59255100  | -1.06316900 |
| H | 0.09709500  | 2.64363700  | -1.73217700 |
| H | -2.98237800 | 1.65673800  | 0.77523200  |
| H | -5.21230500 | 0.72713900  | 1.48369800  |
| H | -4.45001700 | -2.81645000 | -0.78549200 |
| H | -2.23463700 | -1.90194700 | -1.49721500 |
| H | 4.22064200  | -0.22550700 | -1.99287000 |
| H | 6.06437000  | -1.77292300 | -1.41830300 |
| H | 6.45459000  | -2.41974400 | 0.94463800  |
| H | 4.99126800  | -1.51554700 | 2.73206900  |
| H | 3.14878500  | 0.03507200  | 2.16211700  |
| F | -6.12257500 | -1.58829500 | 0.75880100  |

### 17b-TS-19b

E= -519.4803723 a.u., im. freq.= 677.90i

0 2

|   |             |             |             |
|---|-------------|-------------|-------------|
| C | 3.13767700  | 0.12716500  | -0.00002800 |
| O | 2.22217200  | 0.93588800  | 0.00023700  |
| O | 3.51927900  | -0.98795400 | -0.00032500 |
| C | 0.46687400  | 0.39022100  | 0.00011600  |
| C | -0.41275800 | 1.44510600  | -0.00003500 |
| C | -1.77675500 | 1.14159700  | -0.00012500 |

|   |             |             |             |
|---|-------------|-------------|-------------|
| C | -2.16246100 | -0.19292900 | -0.00003700 |
| C | -1.24857400 | -1.23816600 | 0.00013100  |
| C | 0.11899700  | -0.94133100 | 0.00021500  |
| H | -0.06425000 | 2.47099300  | -0.00007400 |
| H | -2.53253500 | 1.91749800  | -0.00023600 |
| H | -1.60441200 | -2.26117400 | 0.00022000  |
| H | 0.85761400  | -1.73230800 | 0.00036900  |
| F | -3.48066900 | -0.48538400 | -0.00011100 |

### 11b-TS-20b

E= -959.6146637 a.u., im. freq.= 423.53i

0 2

|   |             |             |             |
|---|-------------|-------------|-------------|
| C | 1.17702900  | -0.15934200 | 0.06596900  |
| C | 1.62084000  | -1.24548100 | -0.70851100 |
| C | 2.94670300  | -1.65522100 | -0.67229600 |
| C | 3.82744300  | -0.98462300 | 0.16500600  |
| C | 3.42411100  | 0.07921300  | 0.95910200  |
| C | 2.09870800  | 0.48864800  | 0.90526500  |
| O | 1.18542700  | 3.14202800  | -0.10520100 |
| C | 0.29345300  | 2.87948300  | -0.86718100 |
| O | -0.29278100 | 3.09883400  | -1.87993500 |
| C | -0.66821100 | 1.52946000  | 0.07474100  |
| C | -1.97071800 | 2.17053400  | 0.45096600  |
| C | -0.24128600 | 0.25606100  | 0.01522800  |
| C | -1.27518200 | -0.81401200 | -0.17005200 |
| C | -1.31831200 | -1.91486100 | 0.69639200  |
| C | -2.29762400 | -2.88905000 | 0.53902400  |
| C | -3.22988000 | -2.78891000 | -0.49308200 |
| C | -3.18094700 | -1.70788600 | -1.36937500 |
| C | -2.21194700 | -0.72141100 | -1.20636400 |
| C | -2.74407500 | 1.44996100  | 1.46294900  |

|   |             |             |             |
|---|-------------|-------------|-------------|
| N | -3.35259500 | 0.90793400  | 2.27735000  |
| H | 0.92363500  | -1.76210200 | -1.35591800 |
| H | 3.30410000  | -2.47942200 | -1.27644500 |
| H | 4.14180900  | 0.56704300  | 1.60630700  |
| H | 1.77143800  | 1.31624500  | 1.51815300  |
| H | -2.58549400 | 2.33124600  | -0.44186500 |
| H | -1.76448800 | 3.17332000  | 0.84462600  |
| H | -0.59685300 | -1.99413200 | 1.50060000  |
| H | -2.33440900 | -3.72749200 | 1.22492700  |
| H | -3.98920100 | -3.55283600 | -0.61411900 |
| H | -3.89507300 | -1.63127700 | -2.18114800 |
| H | -2.16127000 | 0.11240200  | -1.89780900 |
| F | 5.11246400  | -1.38564600 | 0.21396100  |
